# Supplementary material for: Fine-tuning the acceptor–donor ability of star shaped triarylborane–triphenylamine conjugates: synthesis, characterization and anion binding studies
Source: Royal Society of Chemistry journal article supplement (doi:10.1039/d2nj04439k), 2022-01-01
Supplement: d2nj04439k1.pdf [file d2nj04439k1.pdf]

**Fine-tuning The Acceptor-Donor Ability of Star Shaped Triarylborane-Triphenylamine  
Conjugates: Synthesis, Characterization and Anion Binding Studies**

Archana V Raveendran and Chinna Ayya Swamy P\*

† Main Group Organometallic Optoelectronic Materials and Catalysis Lab, Department of Chemistry, National Institute of Technology, Calicut, India-673601.

*E-mail:* [swamy@nitc.ac.in](mailto:swamy@nitc.ac.in)

**TABLE OF CONTENTS**

|                                |              |
|--------------------------------|--------------|
| 1. Optical Properties          | Page S2-S7   |
| 2. Sensing Studies             | Page S7-S11  |
| 3. Structural Characterization | Page S12-S20 |
| 4. DFT computational data      | Page S21-S44 |
| 5. References                  | Page S44     |

## 1. Optical properties

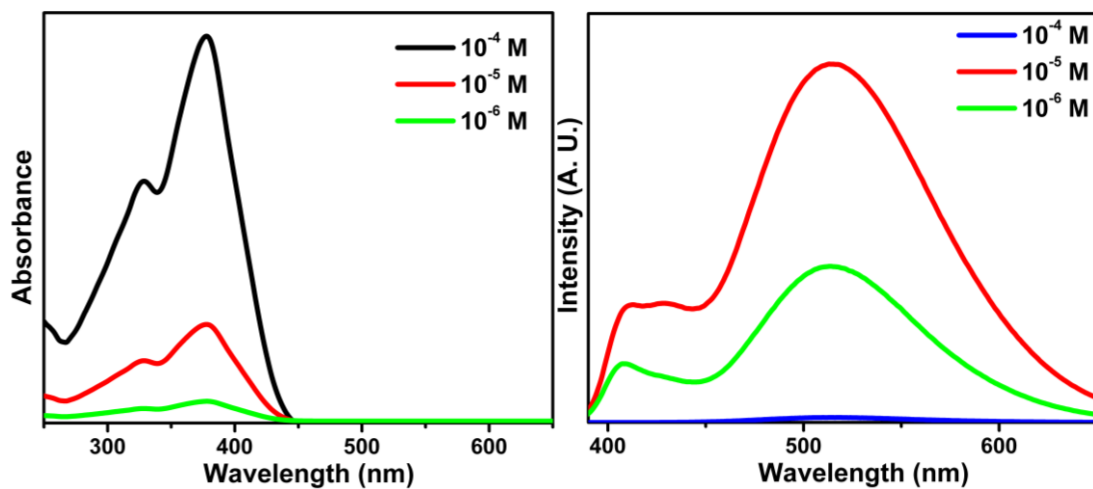

**Figure S1:** UV-Visible (left) and fluorescence (right) spectra of **1** in dichloromethane at various concentrations ( $\lambda_{\text{ex}}$  at 375 nm).

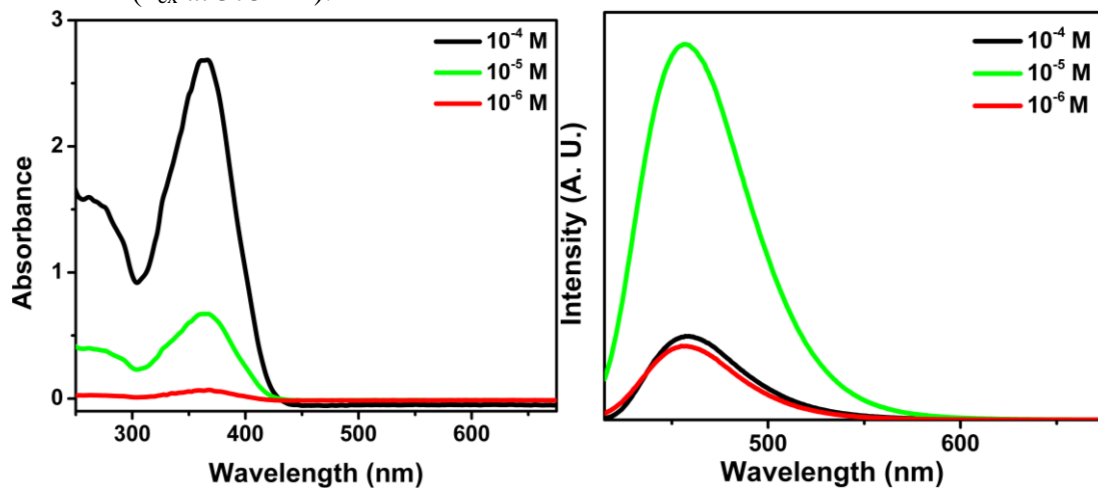

**Figure S2:** UV-Visible (left) and fluorescence (right) spectra of **2** in dichloromethane at various concentrations ( $\lambda_{\text{ex}}$  at 375 nm).

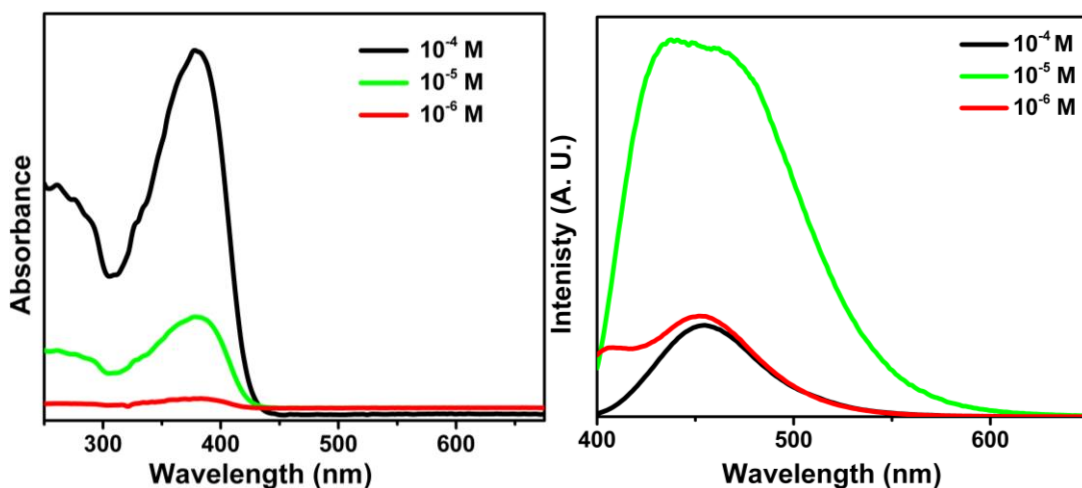

**Figure S3:** UV-Visible (left) and fluorescence (right) spectra of **3** in dichloromethane at various concentrations ( $\lambda_{\text{ex}}$  at 375 nm).

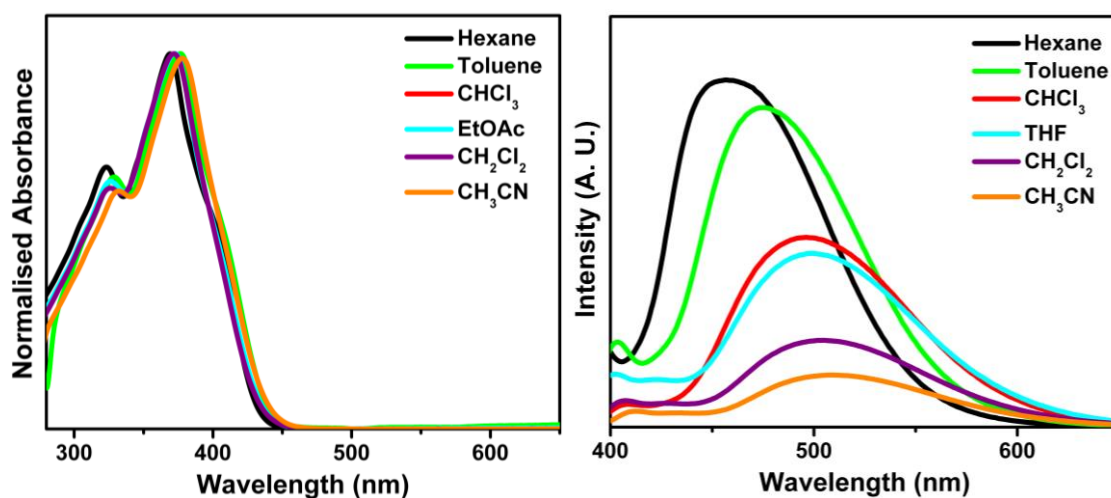

**Figure S4:** UV-Visible (right) and Fluorescence (left) spectra of **1** in solvents with different polarity (10  $\mu\text{M}$ ;  $\lambda_{\text{ex}}$  at 375 nm).

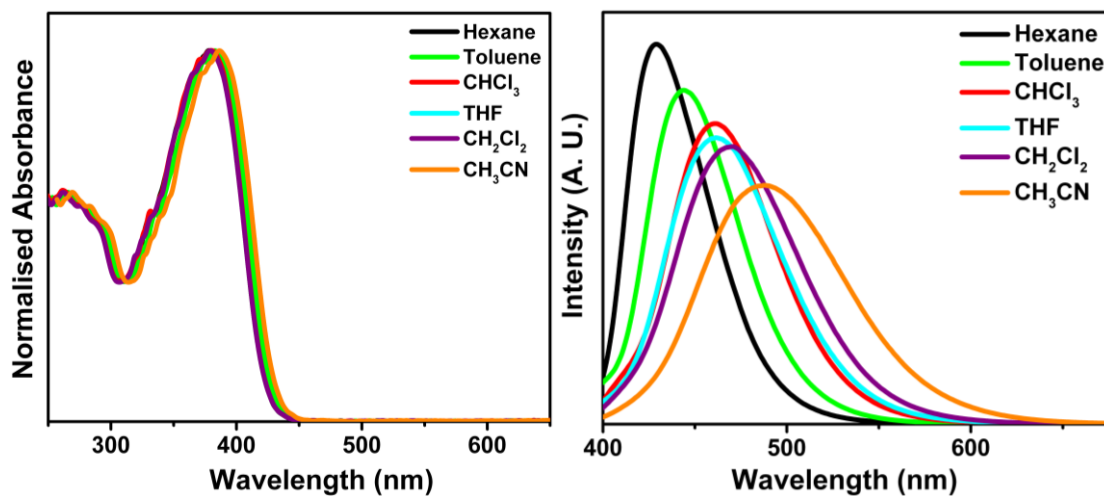

**Figure S5:** UV-Visible (right) and Fluorescence (left) spectra of **2** in solvents with different polarity (10  $\mu\text{M}$ ;  $\lambda_{\text{ex}}$  at 375 nm).

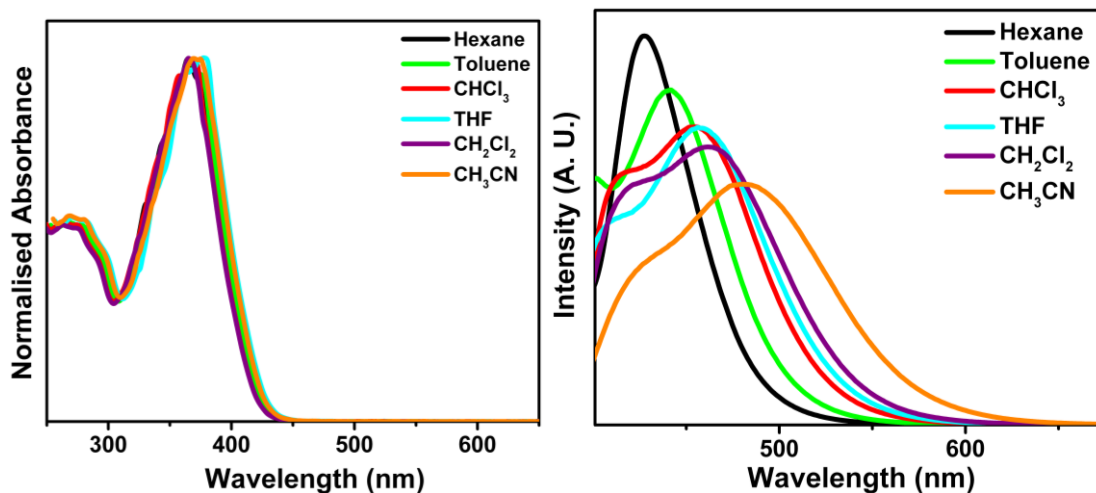

**Figure S6:** UV-Visible (right) and Fluorescence (left) spectra of **3** in solvents with different polarity (10  $\mu\text{M}$ ;  $\lambda_{\text{ex}}$  at 375 nm).

**Table S1:** Optical data of **1** in different solvents.

| S. No | Solvent                  | $\lambda_{\text{abs}}$ (nm) | $\lambda_{\text{em}}$ (nm) | $\lambda_{\text{em}} - \lambda_{\text{abs}}$ ( $\text{cm}^{-1}$ ) | Quantum yields (%) |
|-------|--------------------------|-----------------------------|----------------------------|-------------------------------------------------------------------|--------------------|
| 1     | Hexane                   | 369                         | 458                        | 5266.27                                                           | 40.4               |
| 2     | Toluene                  | 376                         | 475                        | 5543.11                                                           | 37.8               |
| 3     | $\text{CHCl}_3$          | 373                         | 492                        | 6484.45                                                           | 22.5               |
| 4     | THF                      | 372                         | 499                        | 6841.64                                                           | 21.8               |
| 5     | $\text{CH}_2\text{Cl}_2$ | 391                         | 515                        | 6157.97                                                           | 11.3               |
| 6     | $\text{CH}_3\text{CN}$   | 378                         | 520                        | 7224.26                                                           | 9.2                |

**Table S2:** Optical data of **2** in different solvents.

| S. No | Solvent                  | $\lambda_{\text{abs}}$ (nm) | $\lambda_{\text{em}}$ (nm) | $\lambda_{\text{em}} - \lambda_{\text{abs}}$ ( $\text{cm}^{-1}$ ) | Quantum yields (%) |
|-------|--------------------------|-----------------------------|----------------------------|-------------------------------------------------------------------|--------------------|
| 1     | Hexane                   | 378                         | 429                        | 3145.01                                                           | 76.2               |
| 2     | Toluene                  | 383                         | 443                        | 3536.3                                                            | 74.5               |
| 3     | $\text{CHCl}_3$          | 379                         | 461                        | 4693.25                                                           | 72.2               |
| 4     | THF                      | 372                         | 461                        | 5189.75                                                           | 71.4               |
| 5     | $\text{CH}_2\text{Cl}_2$ | 378                         | 470                        | 5178.43                                                           | 70.5               |
| 6     | $\text{CH}_3\text{CN}$   | 386                         | 486                        | 5330.61                                                           | 68.8               |

**Table S3:** Optical data of **3** in different solvents.

| S. No | Solvent | $\lambda_{\text{abs}}$ (nm) | $\lambda_{\text{em}}$ (nm) | $\lambda_{\text{em}} - \lambda_{\text{abs}}$ ( $\text{cm}^{-1}$ ) | Quantum yields (%) |
|-------|---------|-----------------------------|----------------------------|-------------------------------------------------------------------|--------------------|
|-------|---------|-----------------------------|----------------------------|-------------------------------------------------------------------|--------------------|

|   |                                 |     |     |         |      |
|---|---------------------------------|-----|-----|---------|------|
| 1 | Hexane                          | 364 | 407 | 2902.51 | 78.9 |
| 2 | Toluene                         | 366 | 420 | 3512.88 | 77.1 |
| 3 | CHCl <sub>3</sub>               | 369 | 432 | 3952.12 | 75.4 |
| 4 | THF                             | 378 | 436 | 3519.25 | 73.6 |
| 5 | CH <sub>2</sub> Cl <sub>2</sub> | 365 | 440 | 4670.26 | 74.5 |
| 6 | CH <sub>3</sub> CN              | 369 | 461 | 5408.30 | 72.1 |

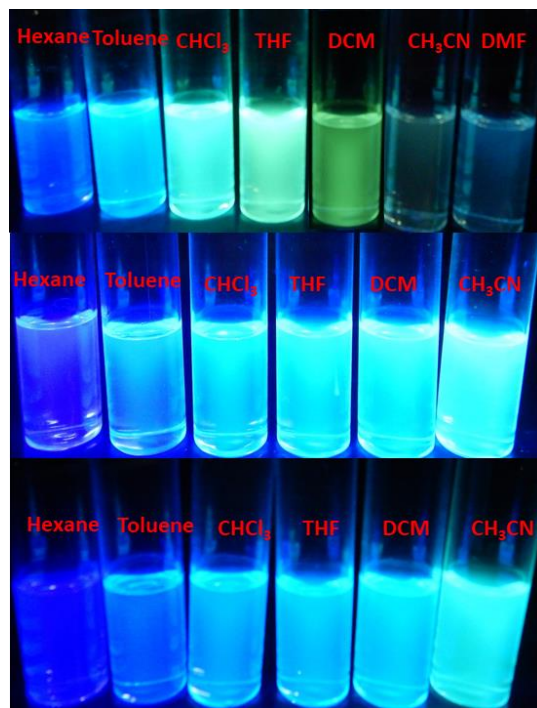

**Figure S7:** Digital photos of compounds **1**, **2** and **3** with different solvents.

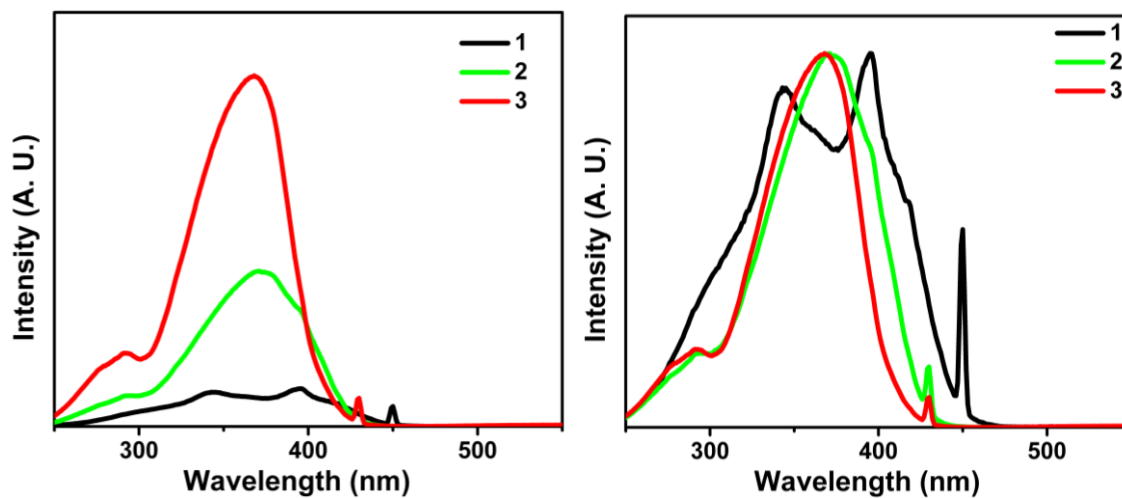

**Figure S8:** The excitation spectra (left) and normalised (right) of **1**, **2** and **3**.

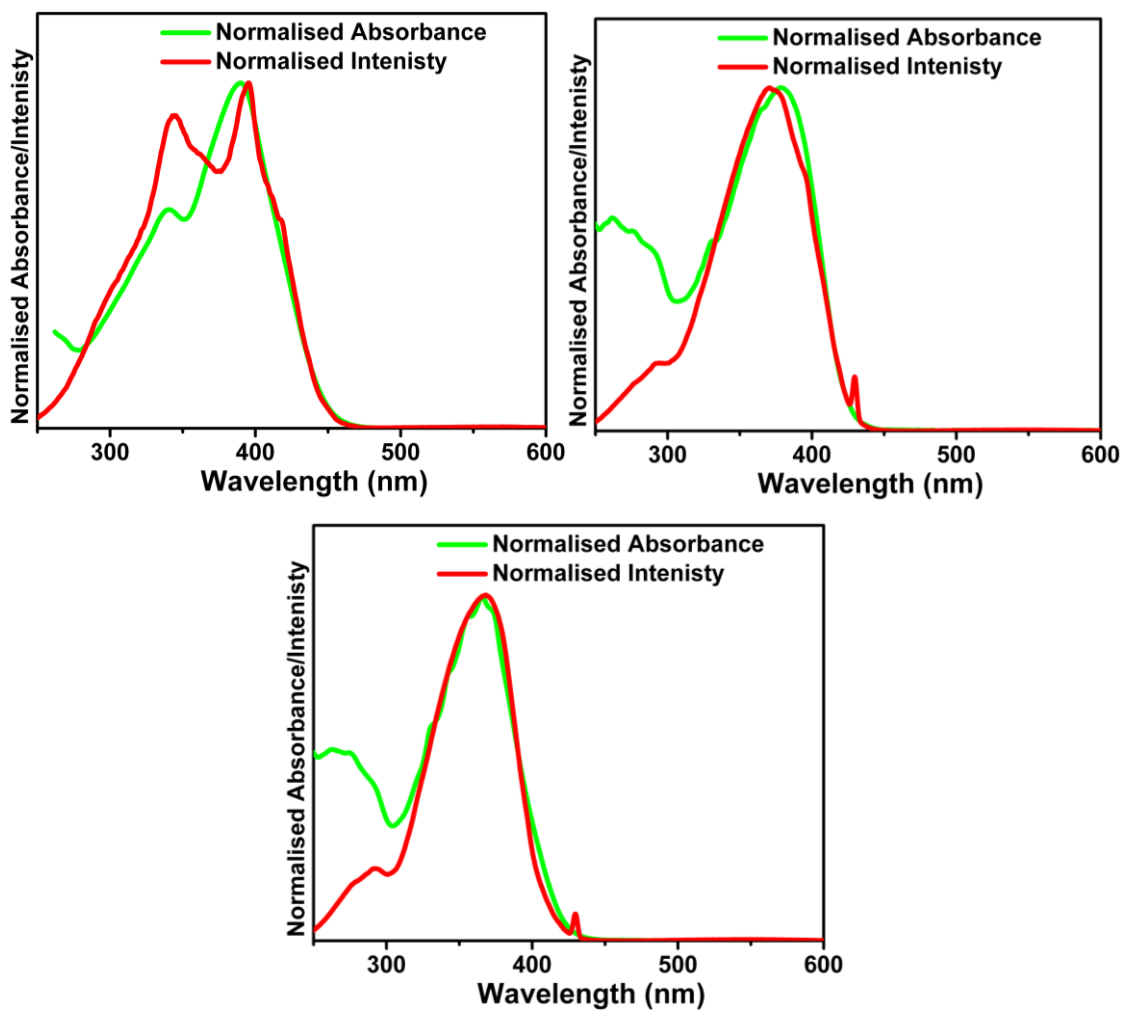

**Figure S9:** The compared normalised absorption and excitation spectra of **1** (top left), **2** (top left) and **3** (bottom).

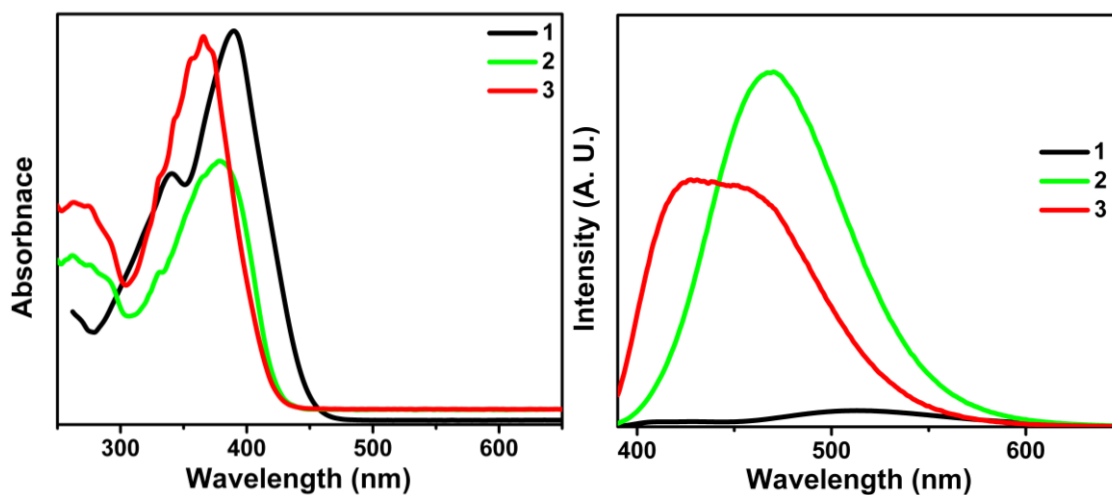

**Figure S10:** Compared UV-Visible (left) and Fluorescence (right) spectra of **1**, **2** and **3** in dichloromethane (10  $\mu$ M;  $\lambda_{\text{ex}}$  at 375 nm).

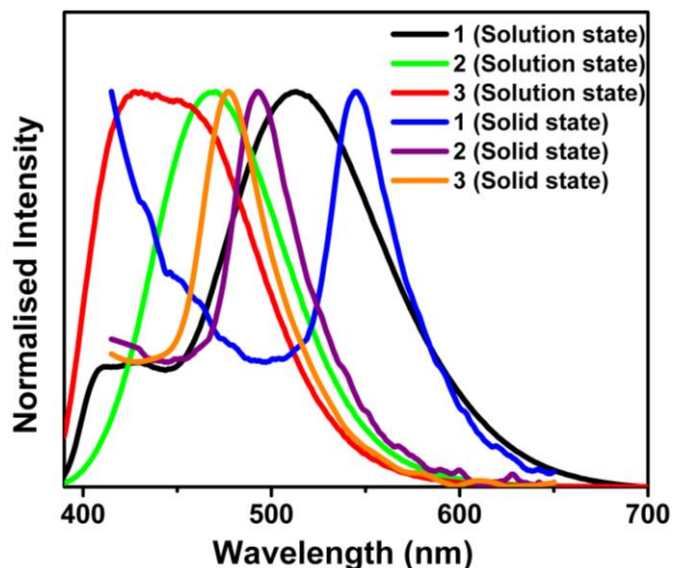

**Figure S11:** Compared fluorescence spectra of **1**, **2** and **3** in solution and solid state.

## 2. Sensing studies

### Absorbance and Fluorescence titrations studies in Dichloromethane medium

The titration studies were carried out by placing 2 mL of compounds **1**, **2** and **3** were in  $1 \times 10^{-5}$  M stock solution in dichloromethane. A septum screw capped quartz cuvette of 1 cm width and followed by gradual incremental addition of  $1 \times 10^{-3}$  M DCM solution of anions. The experiment was repeated for at least three times at 298 K to obtain concordant value. Compounds **1**, **2** or **3** were excited at 375 nm and the emissions were monitored in the range of 400-700 nm (2 nm slit width kept constant for both source and detector).

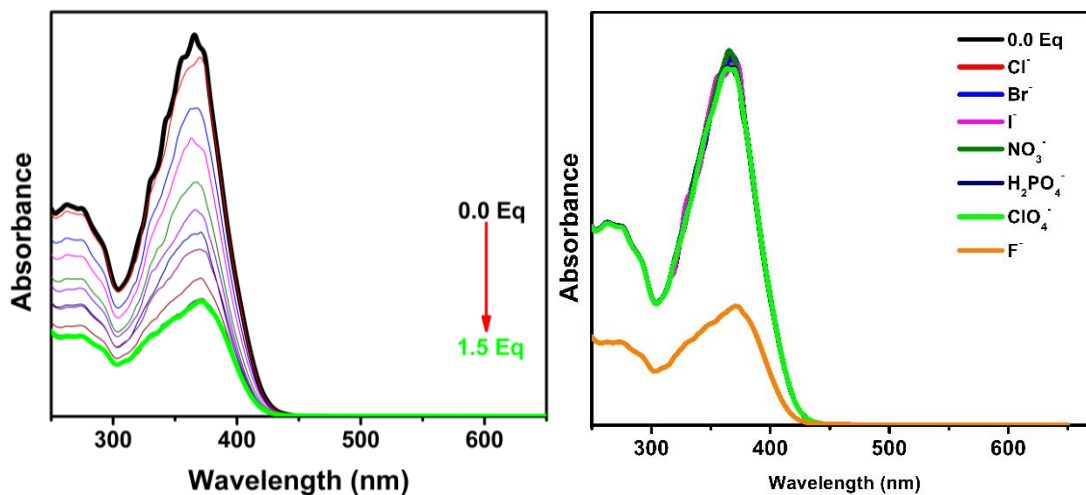

**Figure S12:** Changes associated with UV-Visible spectra of **3** with fluoride ions (left) and in presence of various anions (right) (DCM, 10  $\mu$ M).

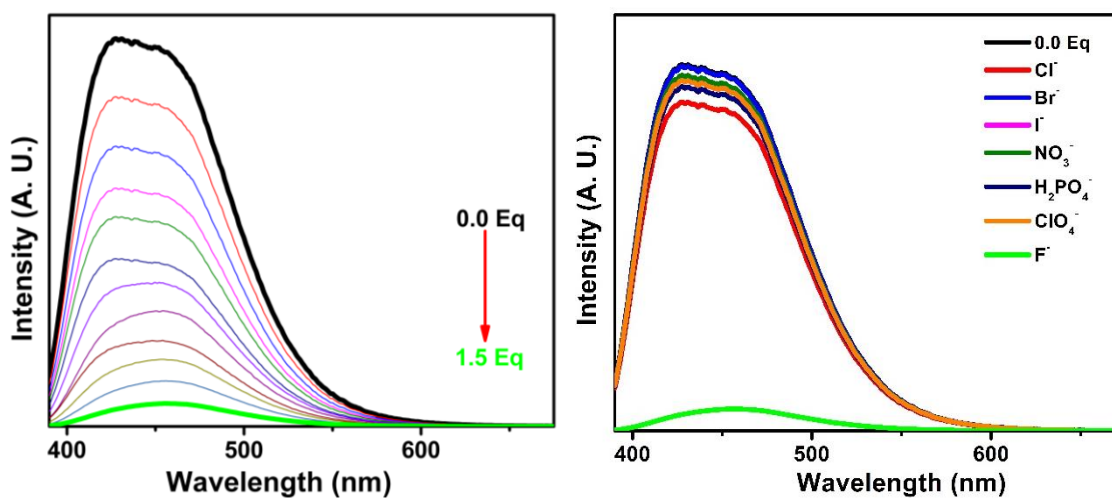

**Figure S13:** Changes associated with PL spectra of **3** with fluoride ions (left) and in presence of various anions (right) (DCM, 10  $\mu$ M).



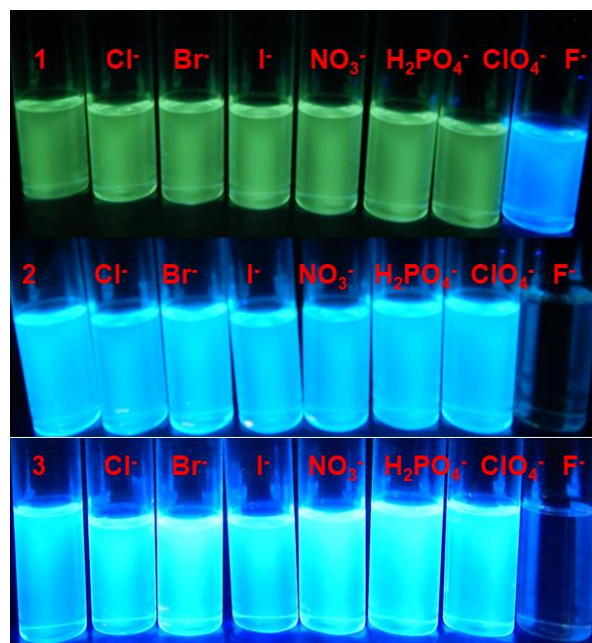

**Figure S14:** Digital photograph of compounds **1**, **2** and **3** with different anions.

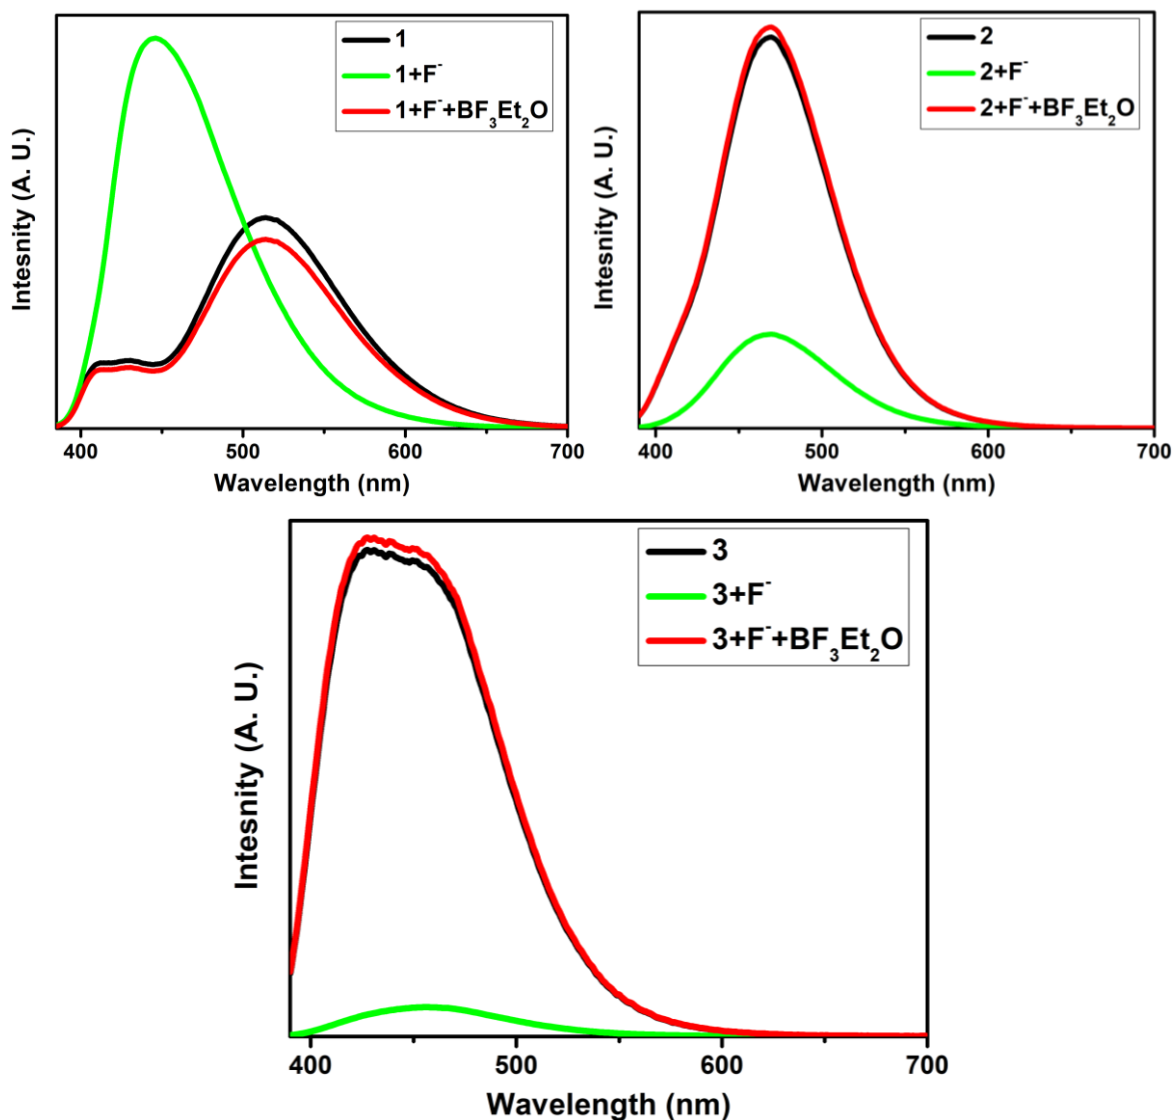

**Figure S15:** Reversible studies of **1**, **2** and **3**

### 3. Determination of Binding Constant<sup>2</sup>

Solution of compounds **1** or **2** or **3** (2 mL,  $1 \times 10^{-5}$  M) were placed in a septa screw capped quartz cuvette and was titrated against incremental amount of fluoride ions. The change in absorbance of the band around 375 nm with respect to fluoride concentration was used for calculations.

**Sensor** + F<sup>-</sup> ↔ F<sup>-</sup>• **sensor**; here sensor is compound **1** or **2** or **3**

$$I = K_s[\text{sensor}] + K_p[\text{F} \cdot \text{sensor}]$$

$$I_0 = K_s[\text{sensor}]_0$$

$$[\text{sensor}]_0 = [\text{sensor}] + [\text{F} \cdot \text{sensor}]$$

$$K = [\text{F} \cdot \text{sensor}] / [\text{sensor}][\text{F}]$$

$$I/I_0 = (1 + (K_p/K_s)K[\text{F}]) / (1 + K[\text{F}]) (1 - I/I_0) / [\text{F}] \rightarrow K(I/I_0) - K(K_p/K_s)I/I_0 = 1 + K(1 - I/I_0) / [\text{F}]$$

Here,  $I_0$  is initial absorbance of respective band (375 nm),  $I$  is absorbance of respective band upon addition of 1.0 equiv of Fluoride. The association constant was obtained from the slope of  $(1 - I/I_0)/[F^-]$  Vs  $I/I_0$ .

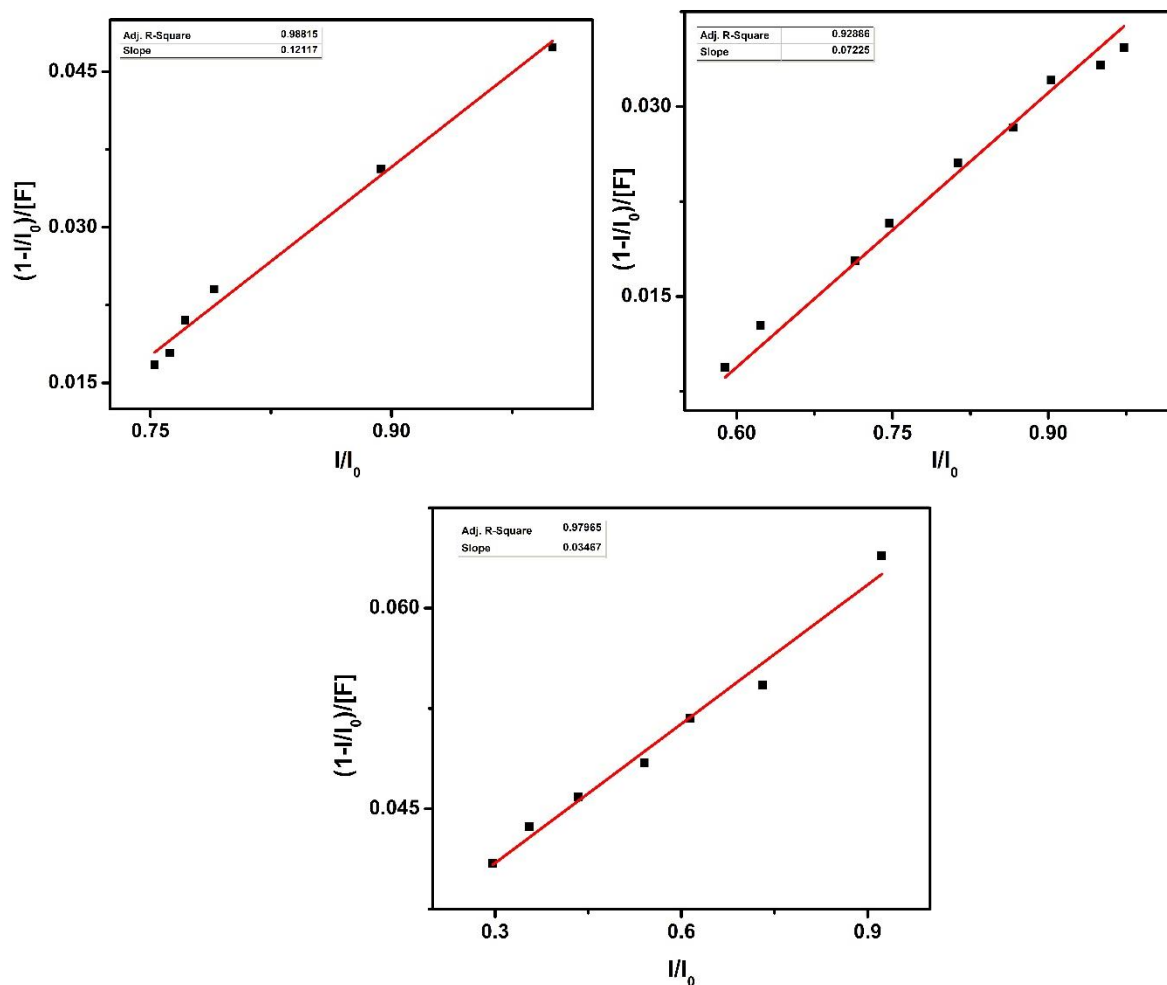

**Figure S16:** The association constant of **1**, **2** and **3** obtained via plot of  $I/I_0$  Vs  $(1 - I/I_0)/[F^-]$  ( $\lambda_{\text{abs}}$  at 375 nm) in dichloromethane

#### 4. Determination of quenching efficiency

Solution of compounds **1** or **2** or **3** (2 mL,  $1 \times 10^{-5}$  M) were placed in a septa screw capped quartz cuvette and was titrated against incremental amount of fluoride ions and monitored change in fluorescence band around  $\sim 470$  nm. Fluorescence quenching efficiency for **1** and **2** were calculated by the following equation.

$$\eta = (I_0 - I)/I_0 \times 100 (\%)$$

Where,  $I_0$  is the initial PL intensity of the sensors (**1** or **2** or **3**) and  $I$  is the intensity after addition of 1 equivalent of fluoride.

## 5. Calculation of Limit of Detection (LoD)

The limit of detection of compound **1**, **2** and **3** were calculated from the fluorescence quenching titration experiment. The intercept to X-axis ( $\log[F^-]$ ) was obtained by linear fitting of the  $(I_{\max}-I)/(I_{\max}-I_{\min})$  vs  $\log[F^-]$ , where  $I_{\max}$ ,  $I$  and  $I_{\min}$  are the initial fluorescence intensity, PL intensity at particular concentration and PL intensity at saturation point respectively. Limit of detection were calculated using the formula,  $([F^-] \times \text{MWPA})/1000$  (multiplied by  $10^9$  to get the values in ppb), where MWPA is the molecular weight of  $F^-$  source.

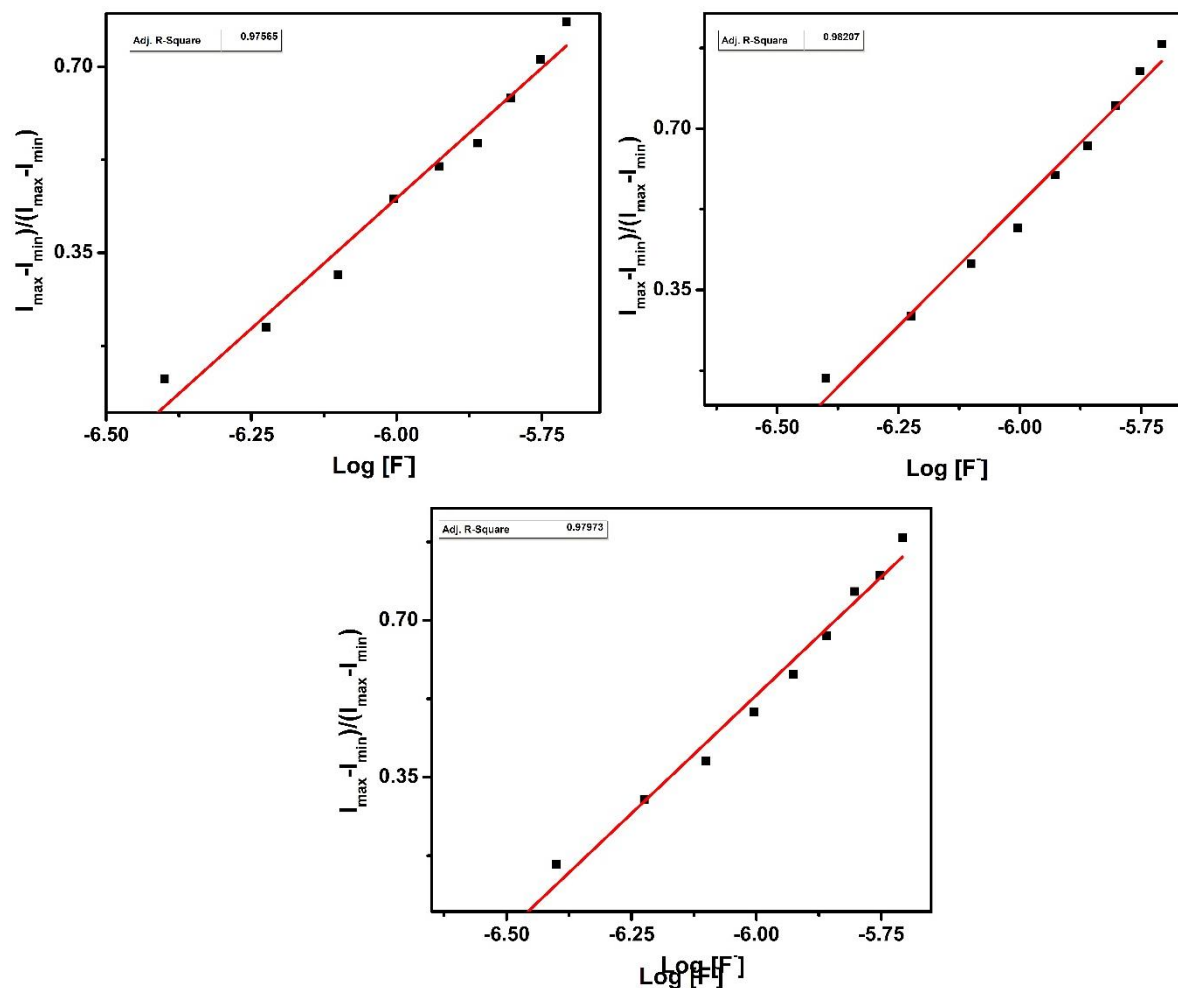

**Figure S17:**  $(I_{\max}-I)/(I_{\max}-I_{\min})$  vs  $\log[F^-]$  plots for PL data obtained for **1** (top left) **2** (top right) and **3** (bottom) in Dichloromethane.

## 6. Structural Characterization

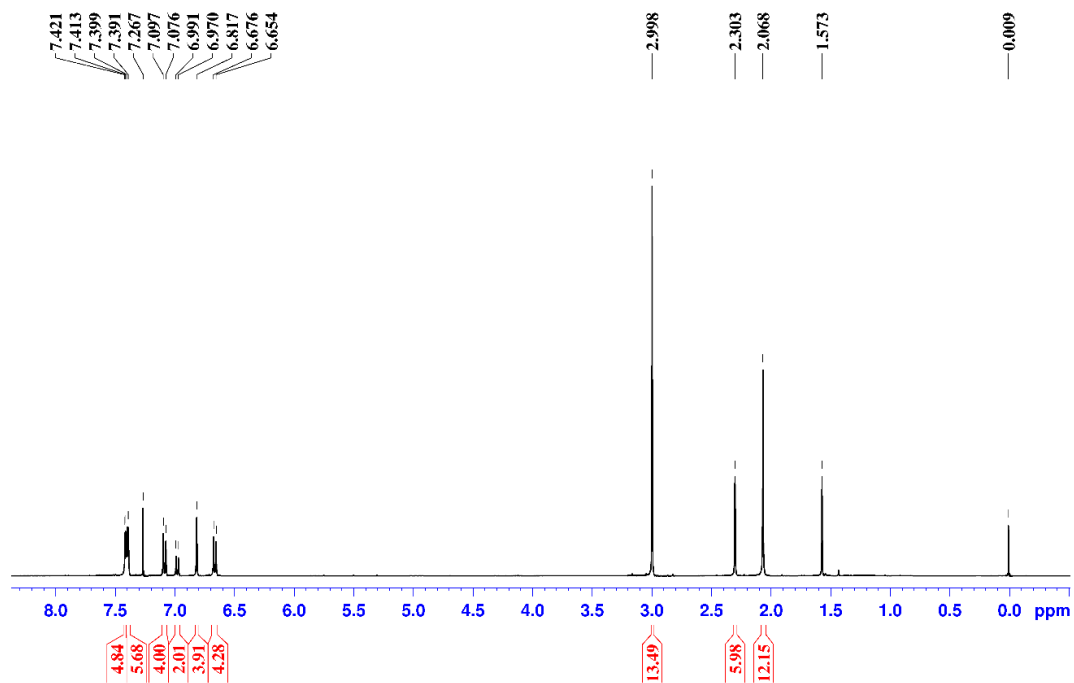

**Figure S18:**  $^1\text{H}$  NMR ( $\text{CDCl}_3$ , 400 MHz) of compound **1**

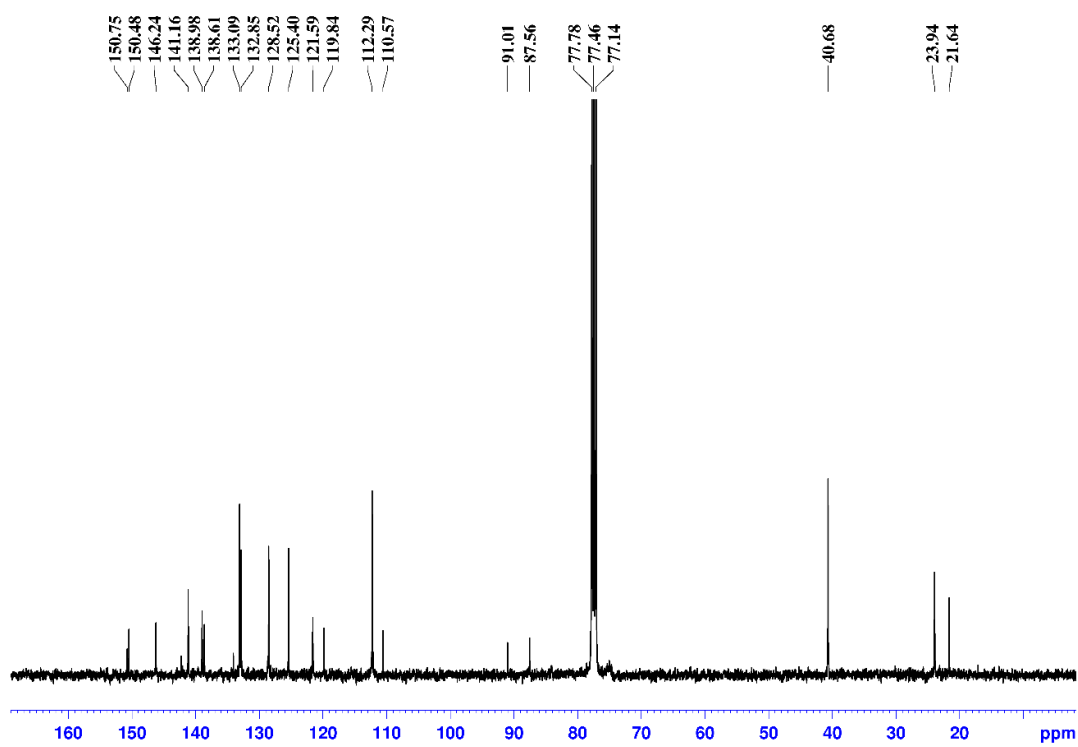

**Figure S19:**  $^{13}\text{C}$  NMR ( $\text{CDCl}_3$ , 400 MHz) of compound **1**

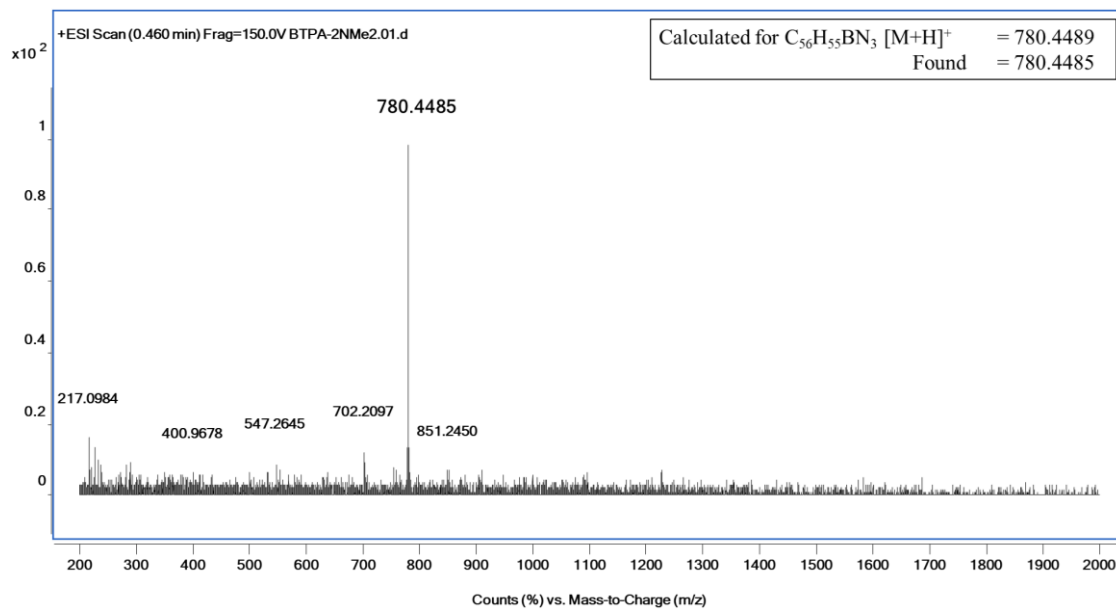

**Figure S20: HRMS of compound 1**

PT-TFA-BMes2-2Ph

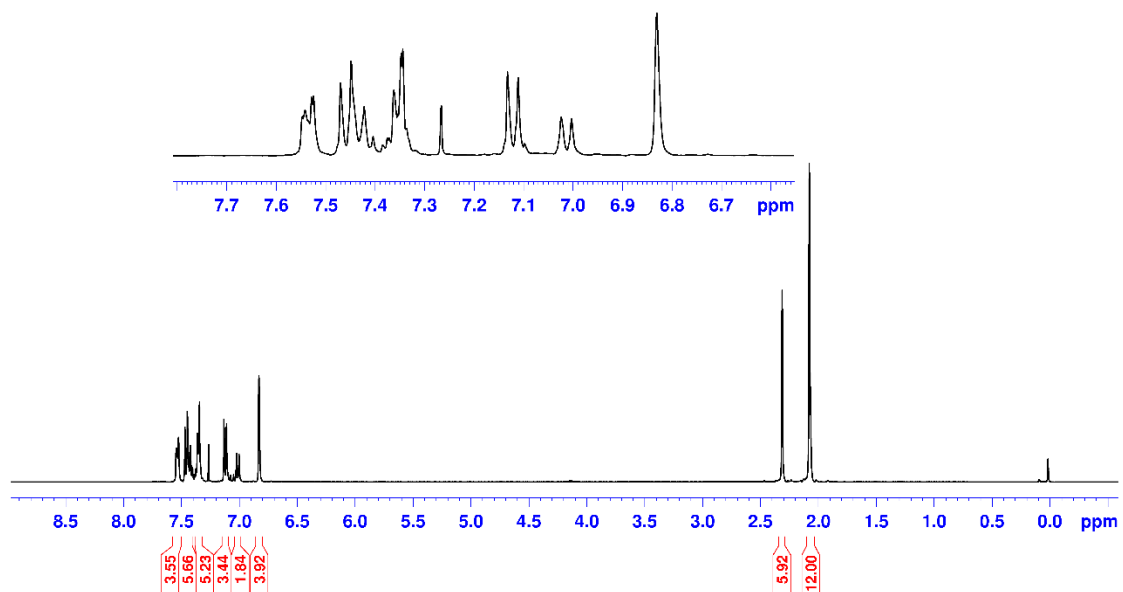

**Figure S21:**  $^1\text{H}$  NMR ( $\text{CDCl}_3$ , 400 MHz) of compound **2**



PT-TPH-BMes-2PH

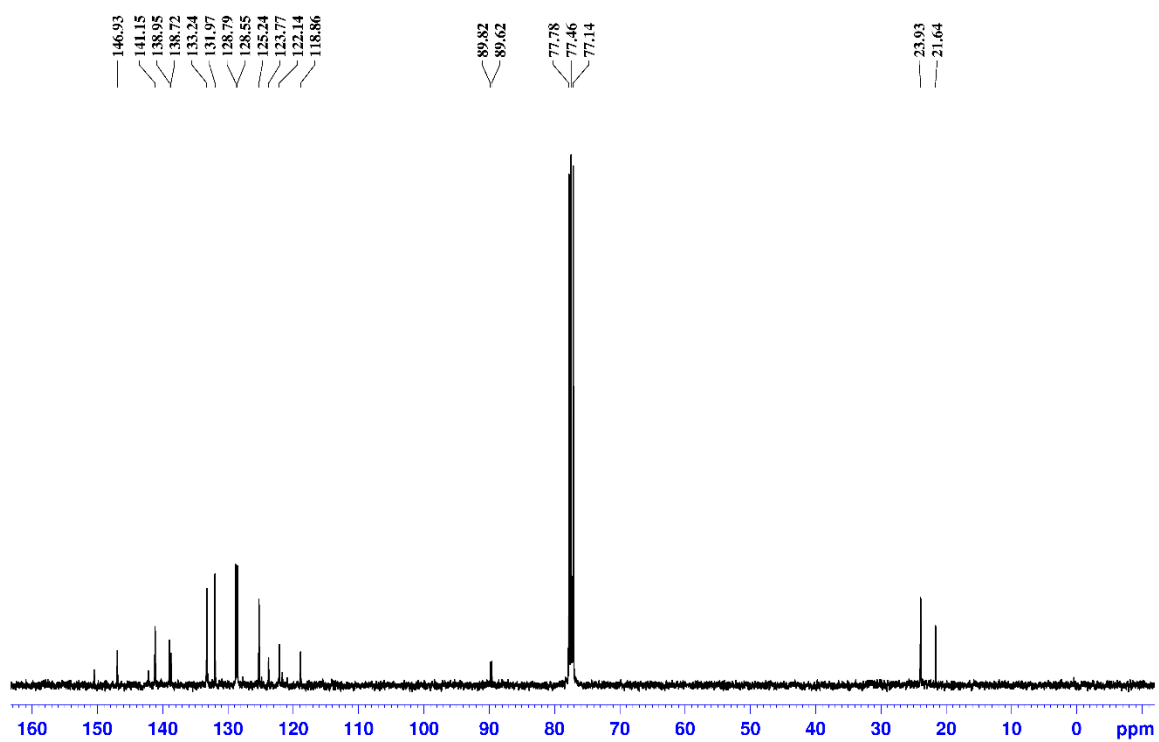

**Figure S22:**  $^{13}\text{C}$  NMR ( $\text{CDCl}_3$ , 400 MHz) of compound **2**

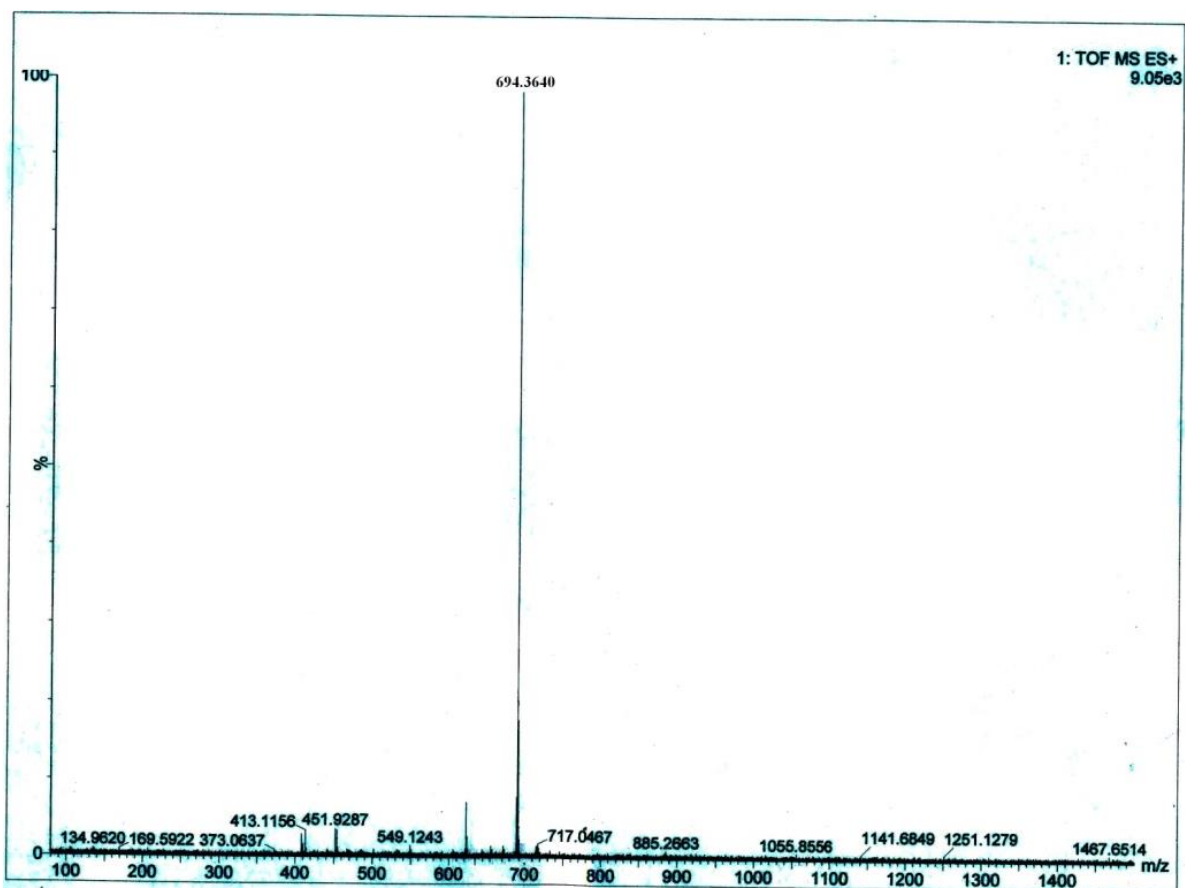

Figure S23: HRMS of compound 2

PT-TFA-BMES2-2CN

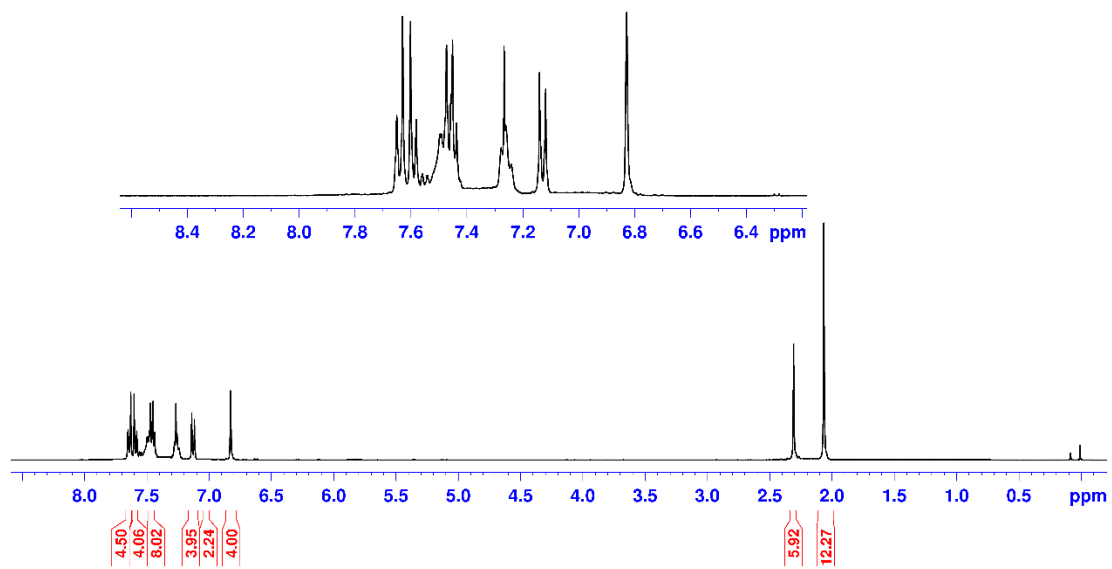

**Figure S24:**  $^1\text{H}$  NMR ( $\text{CDCl}_3$ , 400 MHz) of compound 3

PT-TPA-BMes2-2CN

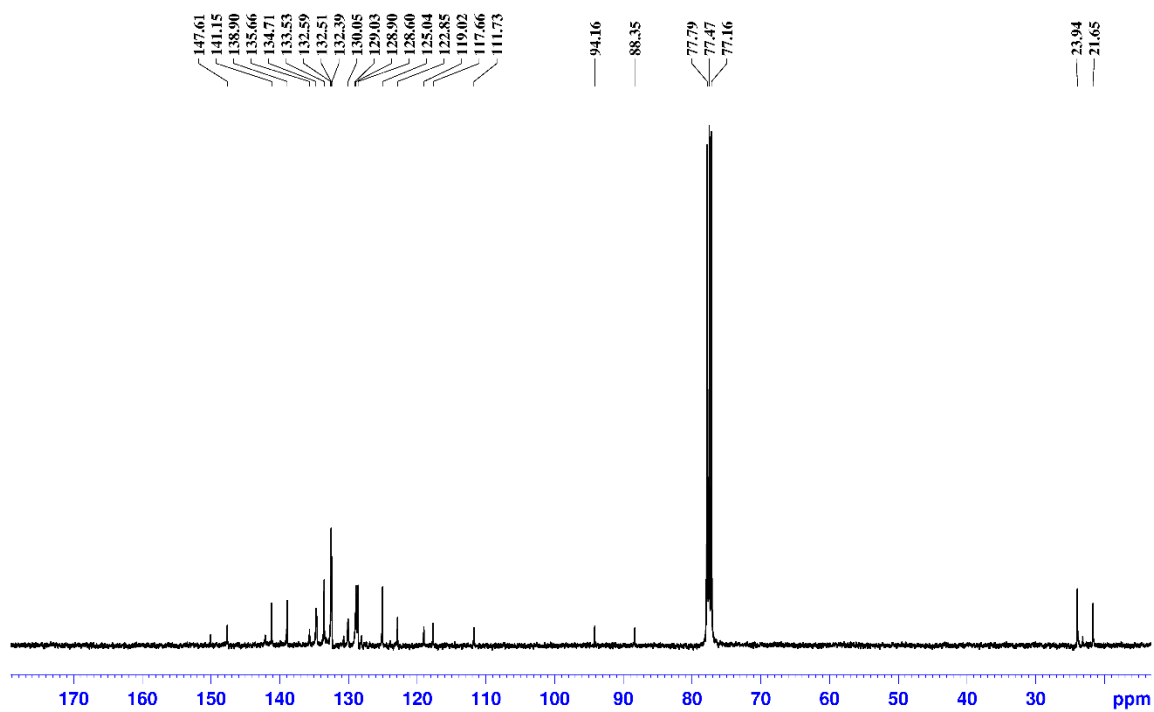

**Figure S25:**  $^{13}\text{C}$  NMR ( $\text{CDCl}_3$ , 400 MHz) of compound **3**

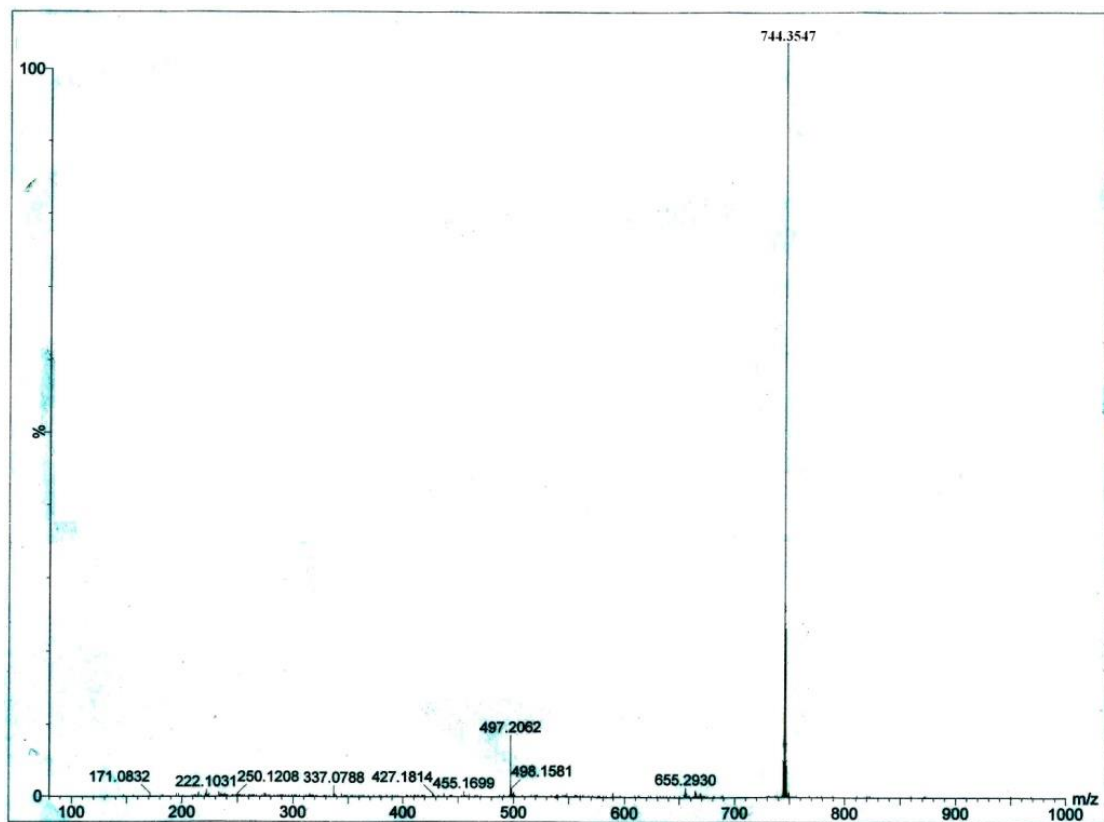

Figure S26: HRMS of compound 3

## 8. DFT Computational data

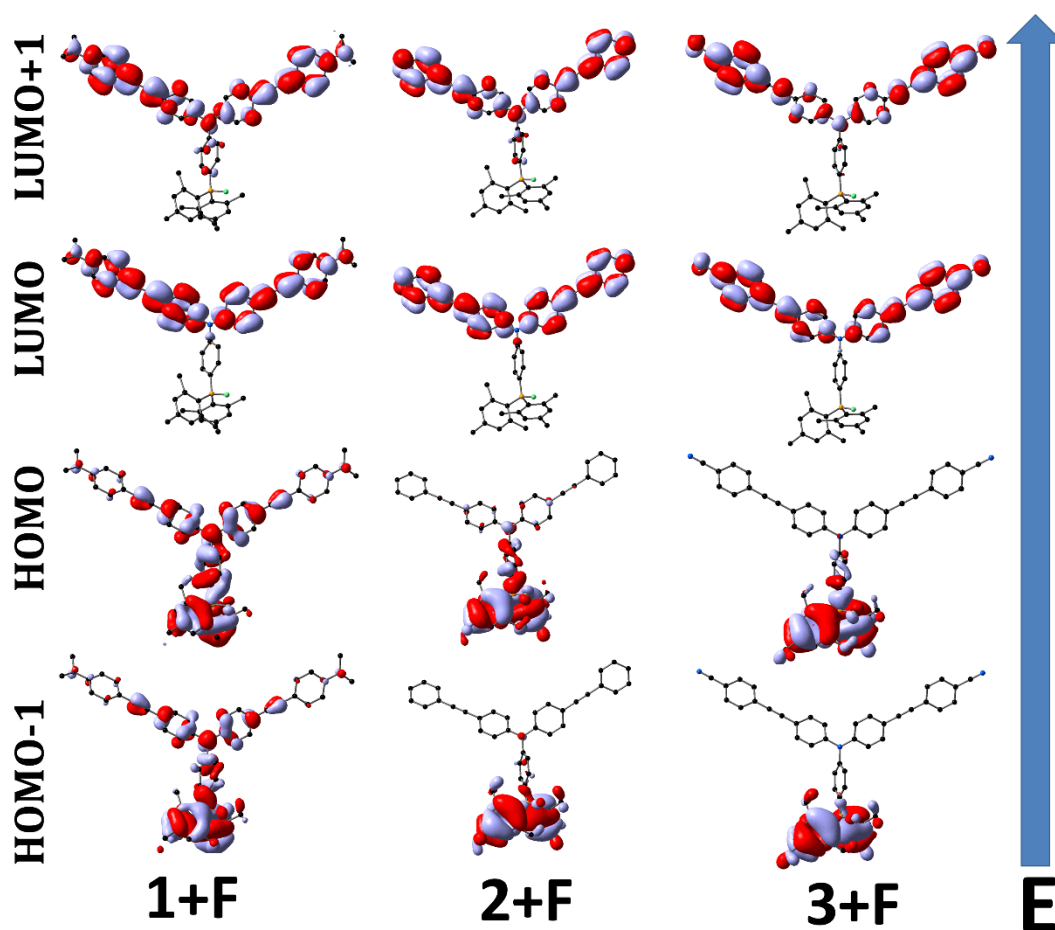

**Figure S27:** Optimized geometries and selected molecular orbital of  $1+F^-$ ,  $2+F^-$  and  $3+F^-$ .

**Table S4:** Spatial coordinate for optimized **1**

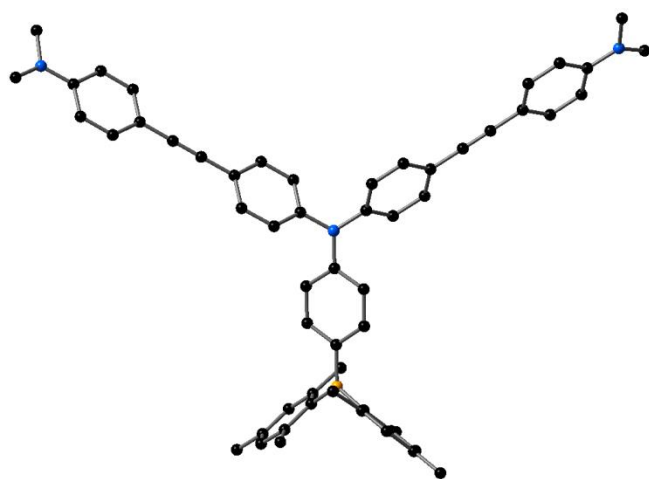

| Atom | X | Y | Z |
|------|---|---|---|
|------|---|---|---|

|   |             |             |             |
|---|-------------|-------------|-------------|
| C | 1.22414469  | -1.08805176 | 0.04218180  |
| C | 1.42331572  | -2.19428504 | -0.79948107 |
| C | 2.24591947  | -0.72380689 | 0.93435160  |
| C | 2.60838496  | -2.91607189 | -0.74973704 |
| H | 0.64106528  | -2.48318282 | -1.49428758 |
| C | 3.43709642  | -1.43658634 | 0.97349316  |
| H | 2.09880762  | 0.12337276  | 1.59667644  |
| C | 3.64540936  | -2.55143937 | 0.13445049  |
| H | 2.75070046  | -3.76724289 | -1.40836394 |
| H | 4.21822294  | -1.14501498 | 1.66878184  |
| C | -1.22415962 | -1.08800347 | -0.04349504 |
| C | -1.42340009 | -2.19408185 | 0.79835659  |
| C | -2.24591628 | -0.72382278 | -0.93570472 |
| C | -2.60853777 | -2.91576395 | 0.74876965  |
| H | -0.64115239 | -2.48293121 | 1.49318695  |
| C | -3.43716461 | -1.43649644 | -0.97469424 |
| H | -2.09873877 | 0.12323366  | -1.59817390 |
| C | -3.64556047 | -2.55117356 | -0.13544612 |
| H | -2.75092276 | -3.76680915 | 1.40754347  |
| H | -4.21828176 | -1.14496912 | -1.67001201 |
| C | 0.00001547  | 1.04892605  | -0.00064619 |
| C | -1.04423228 | 1.77036071  | 0.61117674  |
| C | 1.04427779  | 1.77041721  | -0.61239052 |
| C | -1.03124560 | 3.15813218  | 0.61054336  |
| H | -1.85384019 | 1.23351084  | 1.09433632  |
| C | 1.03136054  | 3.15818607  | -0.61153215 |
| H | 1.85384842  | 1.23359753  | -1.09564802 |
| C | 0.00008397  | 3.90850565  | -0.00041077 |
| H | -1.84252618 | 3.68533285  | 1.10528660  |
| H | 1.84264898  | 3.68542980  | -1.10621525 |
| N | 0.00001362  | -0.36199291 | -0.00073003 |

|   |             |            |             |
|---|-------------|------------|-------------|
| B | 0.00019339  | 5.47153268 | -0.00008335 |
| C | -0.93051071 | 6.24337961 | 1.03226582  |
| C | -0.80764831 | 6.06374896 | 2.43282822  |
| C | -1.95379734 | 7.12062182 | 0.56934200  |
| C | -1.67316352 | 6.73132400 | 3.31254142  |
| C | -2.80407409 | 7.75347648 | 1.47607430  |
| C | -2.68133554 | 7.57649897 | 2.85933778  |
| H | -1.54827478 | 6.58065919 | 4.38416252  |
| H | -3.58871000 | 8.40467348 | 1.09355483  |
| C | 0.93104632  | 6.24380750 | -1.03197136 |
| C | 0.80815524  | 6.06514271 | -2.43267902 |
| C | 1.95460301  | 7.12040993 | -0.56845460 |
| C | 1.67397007  | 6.73294937 | -3.31191409 |
| C | 2.80511705  | 7.75358284 | -1.47475236 |
| C | 2.68239339  | 7.57751943 | -2.85812495 |
| H | 1.54913026  | 6.58295857 | -4.38363254 |
| H | 3.58996290  | 8.40425823 | -1.09177665 |
| C | -0.28011249 | 5.22042755 | -3.06939788 |
| H | -1.01627418 | 5.85872892 | -3.57605336 |
| H | 0.13856358  | 4.55173121 | -3.83118003 |
| H | -0.81823476 | 4.60385783 | -2.34841434 |
| C | 2.18448203  | 7.36871424 | 0.90857221  |
| H | 2.43960568  | 6.44588405 | 1.44380074  |
| H | 3.01076914  | 8.07099087 | 1.05930616  |
| H | 1.29544264  | 7.78435873 | 1.39335744  |
| C | 3.61271518  | 8.28535909 | -3.81485177 |
| H | 3.51849249  | 9.37577834 | -3.73211359 |
| H | 4.66211496  | 8.03959600 | -3.60891289 |
| H | 3.40286573  | 8.01096677 | -4.85368420 |
| C | 0.28006812  | 5.21790093 | 3.06903825  |
| H | 0.82062585  | 4.60457863 | 2.34711661  |



|   |              |             |             |
|---|--------------|-------------|-------------|
| H | 1.01420686   | 5.85516978  | 3.57988380  |
| H | -0.13966842  | 4.54580992  | 3.82726236  |
| C | -2.18363228  | 7.36993918  | -0.90751437 |
| H | -1.29444676  | 7.78552551  | -1.39208138 |
| H | -2.43915253  | 6.44752809  | -1.44328169 |
| H | -3.00964765  | 8.07263566  | -1.05778054 |
| C | -3.61139150  | 8.28403541  | 3.81654688  |
| H | -3.51735040  | 9.37448117  | 3.73398794  |
| H | -4.66083547  | 8.03816812  | 3.61094226  |
| H | -3.40113489  | 8.00945433  | 4.85524695  |
| C | -4.86160210  | -3.28627180 | -0.17747076 |
| C | -5.90154407  | -3.91978674 | -0.20652736 |
| C | 4.86136992   | -3.28665944 | 0.17668612  |
| C | 5.90121810   | -3.92031538 | 0.20601330  |
| C | -7.11256435  | -4.66299225 | -0.23233580 |
| C | -8.16159782  | -4.33083318 | -1.11233242 |
| C | -7.31005309  | -5.76740446 | 0.62021444  |
| C | -9.34377037  | -5.05548125 | -1.13910733 |
| H | -8.03746458  | -3.48931264 | -1.78756504 |
| C | -8.48838599  | -6.49791143 | 0.60118019  |
| H | -6.51711088  | -6.05375376 | 1.30483610  |
| C | -9.54795119  | -6.15730009 | -0.27383789 |
| H | -10.11470468 | -4.76046840 | -1.84071410 |
| H | -8.58332393  | -7.34221564 | 1.27326058  |
| C | 7.11212434   | -4.66369720 | 0.23212693  |
| C | 8.16100328   | -4.33165067 | 1.11235605  |
| C | 7.30964075   | -5.76819209 | -0.62030148 |
| C | 9.34305471   | -5.05648154 | 1.13945017  |
| H | 8.03683518   | -3.49007742 | 1.78751625  |
| C | 8.48785898   | -6.49888131 | -0.60094448 |
| H | 6.51681047   | -6.05447645 | -1.30507992 |

|   |              |             |             |
|---|--------------|-------------|-------------|
| C | 9.54727845   | -6.15837199 | 0.27428102  |
| H | 10.11386742  | -4.76154997 | 1.84122528  |
| H | 8.58279327   | -7.34326780 | -1.27292173 |
| C | -10.84295275 | -8.09458281 | 0.49493693  |
| H | -11.85222283 | -8.49706105 | 0.39019298  |
| H | -10.12861384 | -8.86685715 | 0.16814436  |
| H | -10.67180074 | -7.90491457 | 1.56160447  |
| C | -11.72583530 | -6.60996699 | -1.31059776 |
| H | -12.06566928 | -5.56756157 | -1.27995528 |
| H | -11.34551947 | -6.81400556 | -2.32404100 |
| H | -12.59688005 | -7.24509939 | -1.13868711 |
| C | 10.84212929  | -8.09597740 | -0.49394326 |
| H | 10.67099935  | -7.90648395 | -1.56063793 |
| H | 11.85138699  | -8.49847465 | -0.38913715 |
| H | 10.12775091  | -8.86816576 | -0.16701726 |
| C | 11.72470064  | -6.61149980 | 1.31179511  |
| H | 12.06470046  | -5.56914418 | 1.28144112  |
| H | 11.34394189  | -6.81563818 | 2.32505311  |
| H | 12.59572512  | -7.24672777 | 1.14013129  |
| N | 10.73671999  | -6.86973412 | 0.27817384  |
| N | -10.73746719 | -6.86851251 | -0.27743464 |

**Table S5: Spatial coordinate for optimized 1+F<sup>-</sup> adduct**

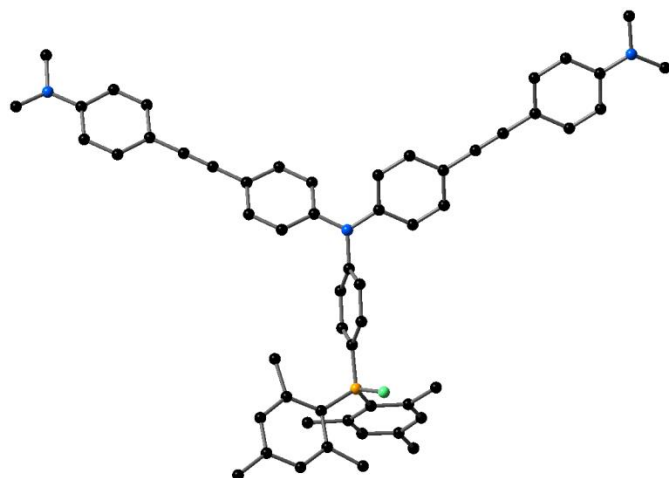

| Atom | X           | Y           | Z           |
|------|-------------|-------------|-------------|
| C    | 1.22414469  | -1.08805176 | 0.04218180  |
| C    | 1.42331572  | -2.19428504 | -0.79948107 |
| C    | 2.24591947  | -0.72380689 | 0.93435160  |
| C    | 2.60838496  | -2.91607189 | -0.74973704 |
| H    | 0.64106528  | -2.48318282 | -1.49428758 |
| C    | 3.43709642  | -1.43658634 | 0.97349316  |
| H    | 2.09880762  | 0.12337276  | 1.59667644  |
| C    | 3.64540936  | -2.55143937 | 0.13445049  |
| H    | 2.75070046  | -3.76724289 | -1.40836394 |
| H    | 4.21822294  | -1.14501498 | 1.66878184  |
| C    | -1.22415962 | -1.08800347 | -0.04349504 |
| C    | -1.42340009 | -2.19408185 | 0.79835659  |
| C    | -2.24591628 | -0.72382278 | -0.93570472 |
| C    | -2.60853777 | -2.91576395 | 0.74876965  |
| H    | -0.64115239 | -2.48293121 | 1.49318695  |
| C    | -3.43716461 | -1.43649644 | -0.97469424 |
| H    | -2.09873877 | 0.12323366  | -1.59817390 |
| C    | -3.64556047 | -2.55117356 | -0.13544612 |
| H    | -2.75092276 | -3.76680915 | 1.40754347  |
| H    | -4.21828176 | -1.14496912 | -1.67001201 |
| C    | 0.00001547  | 1.04892605  | -0.00064619 |

|   |             |             |             |
|---|-------------|-------------|-------------|
| C | -1.04423228 | 1.77036071  | 0.61117674  |
| C | 1.04427779  | 1.77041721  | -0.61239052 |
| C | -1.03124560 | 3.15813218  | 0.61054336  |
| H | -1.85384019 | 1.23351084  | 1.09433632  |
| C | 1.03136054  | 3.15818607  | -0.61153215 |
| H | 1.85384842  | 1.23359753  | -1.09564802 |
| C | 0.00008397  | 3.90850565  | -0.00041077 |
| H | -1.84252618 | 3.68533285  | 1.10528660  |
| H | 1.84264898  | 3.68542980  | -1.10621525 |
| N | 0.00001362  | -0.36199291 | -0.00073003 |
| B | 0.00019339  | 5.47153268  | -0.00008335 |
| C | -0.93051071 | 6.24337961  | 1.03226582  |
| C | -0.80764831 | 6.06374896  | 2.43282822  |
| C | -1.95379734 | 7.12062182  | 0.56934200  |
| C | -1.67316352 | 6.73132400  | 3.31254142  |
| C | -2.80407409 | 7.75347648  | 1.47607430  |
| C | -2.68133554 | 7.57649897  | 2.85933778  |
| H | -1.54827478 | 6.58065919  | 4.38416252  |
| H | -3.58871000 | 8.40467348  | 1.09355483  |
| C | 0.93104632  | 6.24380750  | -1.03197136 |
| C | 0.80815524  | 6.06514271  | -2.43267902 |
| C | 1.95460301  | 7.12040993  | -0.56845460 |
| C | 1.67397007  | 6.73294937  | -3.31191409 |
| C | 2.80511705  | 7.75358284  | -1.47475236 |
| C | 2.68239339  | 7.57751943  | -2.85812495 |
| H | 1.54913026  | 6.58295857  | -4.38363254 |
| H | 3.58996290  | 8.40425823  | -1.09177665 |
| C | -0.28011249 | 5.22042755  | -3.06939788 |
| H | -1.01627418 | 5.85872892  | -3.57605336 |
| H | 0.13856358  | 4.55173121  | -3.83118003 |
| H | -0.81823476 | 4.60385783  | -2.34841434 |

|   |             |             |             |
|---|-------------|-------------|-------------|
| C | 2.18448203  | 7.36871424  | 0.90857221  |
| H | 2.43960568  | 6.44588405  | 1.44380074  |
| H | 3.01076914  | 8.07099087  | 1.05930616  |
| H | 1.29544264  | 7.78435873  | 1.39335744  |
| C | 3.61271518  | 8.28535909  | -3.81485177 |
| H | 3.51849249  | 9.37577834  | -3.73211359 |
| H | 4.66211496  | 8.03959600  | -3.60891289 |
| H | 3.40286573  | 8.01096677  | -4.85368420 |
| C | 0.28006812  | 5.21790093  | 3.06903825  |
| H | 0.82062585  | 4.60457863  | 2.34711661  |
| H | 1.01420686  | 5.85516978  | 3.57988380  |
| H | -0.13966842 | 4.54580992  | 3.82726236  |
| C | -2.18363228 | 7.36993918  | -0.90751437 |
| H | -1.29444676 | 7.78552551  | -1.39208138 |
| H | -2.43915253 | 6.44752809  | -1.44328169 |
| H | -3.00964765 | 8.07263566  | -1.05778054 |
| C | -3.61139150 | 8.28403541  | 3.81654688  |
| H | -3.51735040 | 9.37448117  | 3.73398794  |
| H | -4.66083547 | 8.03816812  | 3.61094226  |
| H | -3.40113489 | 8.00945433  | 4.85524695  |
| C | -4.86160210 | -3.28627180 | -0.17747076 |
| C | -5.90154407 | -3.91978674 | -0.20652736 |
| C | 4.86136992  | -3.28665944 | 0.17668612  |
| C | 5.90121810  | -3.92031538 | 0.20601330  |
| C | -7.11256435 | -4.66299225 | -0.23233580 |
| C | -8.16159782 | -4.33083318 | -1.11233242 |
| C | -7.31005309 | -5.76740446 | 0.62021444  |
| C | -9.34377037 | -5.05548125 | -1.13910733 |
| H | -8.03746458 | -3.48931264 | -1.78756504 |
| C | -8.48838599 | -6.49791143 | 0.60118019  |
| H | -6.51711088 | -6.05375376 | 1.30483610  |

|   |              |             |             |
|---|--------------|-------------|-------------|
| C | -9.54795119  | -6.15730009 | -0.27383789 |
| H | -10.11470468 | -4.76046840 | -1.84071410 |
| H | -8.58332393  | -7.34221564 | 1.27326058  |
| C | 7.11212434   | -4.66369720 | 0.23212693  |
| C | 8.16100328   | -4.33165067 | 1.11235605  |
| C | 7.30964075   | -5.76819209 | -0.62030148 |
| C | 9.34305471   | -5.05648154 | 1.13945017  |
| H | 8.03683518   | -3.49007742 | 1.78751625  |
| C | 8.48785898   | -6.49888131 | -0.60094448 |
| H | 6.51681047   | -6.05447645 | -1.30507992 |
| C | 9.54727845   | -6.15837199 | 0.27428102  |
| H | 10.11386742  | -4.76154997 | 1.84122528  |
| H | 8.58279327   | -7.34326780 | -1.27292173 |
| C | -10.84295275 | -8.09458281 | 0.49493693  |
| H | -11.85222283 | -8.49706105 | 0.39019298  |
| H | -10.12861384 | -8.86685715 | 0.16814436  |
| H | -10.67180074 | -7.90491457 | 1.56160447  |
| C | -11.72583530 | -6.60996699 | -1.31059776 |
| H | -12.06566928 | -5.56756157 | -1.27995528 |
| H | -11.34551947 | -6.81400556 | -2.32404100 |
| H | -12.59688005 | -7.24509939 | -1.13868711 |
| C | 10.84212929  | -8.09597740 | -0.49394326 |
| H | 10.67099935  | -7.90648395 | -1.56063793 |
| H | 11.85138699  | -8.49847465 | -0.38913715 |
| H | 10.12775091  | -8.86816576 | -0.16701726 |
| C | 11.72470064  | -6.61149980 | 1.31179511  |
| H | 12.06470046  | -5.56914418 | 1.28144112  |
| H | 11.34394189  | -6.81563818 | 2.32505311  |
| H | 12.59572512  | -7.24672777 | 1.14013129  |
| N | 10.73671999  | -6.86973412 | 0.27817384  |
| N | -10.73746719 | -6.86851251 | -0.27743464 |

**Table S6: Spatial coordinate for optimized 2**

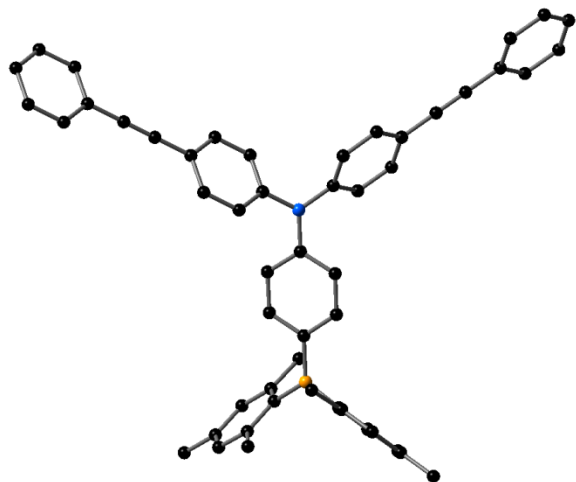

| Atom | X           | Y           | Z           |
|------|-------------|-------------|-------------|
| C    | -2.06744471 | -1.22392439 | 0.07781971  |
| C    | -3.19470719 | -1.44119744 | -0.73201345 |
| C    | -1.66940988 | -2.23384276 | 0.96995161  |
| C    | -3.90391134 | -2.63198946 | -0.65079773 |
| H    | -3.50828569 | -0.67024416 | -1.42846433 |
| C    | -2.37043725 | -3.43000538 | 1.04029662  |
| H    | -0.80618747 | -2.07315471 | 1.60761364  |
| C    | -3.50492731 | -3.65523522 | 0.23350757  |
| H    | -4.77021027 | -2.78918045 | -1.28580660 |
| H    | -2.05363587 | -4.20157639 | 1.73510732  |
| C    | -2.06735598 | 1.22399065  | -0.07793108 |
| C    | -3.19439721 | 1.44146405  | 0.73215151  |
| C    | -1.66943103 | 2.23376518  | -0.97027205 |
| C    | -3.90350989 | 2.63231405  | 0.65096722  |
| H    | -3.50787624 | 0.67061732  | 1.42876635  |
| C    | -2.37036087 | 3.42998690  | -1.04059079 |
| H    | -0.80637044 | 2.07291655  | -1.60811404 |
| C    | -3.50464005 | 3.65541304  | -0.23355824 |

|   |             |             |             |
|---|-------------|-------------|-------------|
| H | -4.76963986 | 2.78966410  | 1.28616699  |
| H | -2.05365279 | 4.20145090  | -1.73556248 |
| C | 0.06689738  | -0.00002908 | -0.00009952 |
| C | 0.78525153  | 1.02540109  | 0.64270883  |
| C | 0.78519360  | -1.02548853 | -0.64292890 |
| C | 2.17384944  | 1.01310205  | 0.64155500  |
| H | 0.24673063  | 1.81948688  | 1.14966642  |
| C | 2.17379164  | -1.01326927 | -0.64179022 |
| H | 0.24662545  | -1.81955053 | -1.14987364 |
| C | 2.92203340  | -0.00010432 | -0.00012067 |
| H | 2.70198442  | 1.80827232  | 1.16072763  |
| H | 2.70186397  | -1.80847483 | -1.16096789 |
| N | -1.34849417 | 0.00000219  | -0.00007201 |
| B | 4.48849334  | -0.00011957 | -0.00002390 |
| C | 5.25747395  | 0.88093653  | 1.07493772  |
| C | 5.07468669  | 0.69606098  | 2.46868978  |
| C | 6.13588386  | 1.92344524  | 0.65930333  |
| C | 5.74024592  | 1.52202465  | 3.38683061  |
| C | 6.76746337  | 2.73209777  | 1.60423524  |
| C | 6.58755289  | 2.54836251  | 2.98026882  |
| H | 5.58726935  | 1.35018321  | 4.45149562  |
| H | 7.41949298  | 3.53272861  | 1.25822157  |
| C | 5.25759407  | -0.88117624 | -1.07489423 |
| C | 5.07479119  | -0.69640648 | -2.46868125 |
| C | 6.13595948  | -1.92368749 | -0.65919821 |
| C | 5.74020179  | -1.52255018 | -3.38675168 |
| C | 6.76743236  | -2.73249673 | -1.60408218 |
| C | 6.58744981  | -2.54892181 | -2.98011442 |
| H | 5.58716526  | -1.35084768 | -4.45142948 |
| H | 7.41942043  | -3.53313311 | -1.25800287 |
| C | 4.23504132  | 0.42378693  | -3.05379185 |



|   |             |             |             |
|---|-------------|-------------|-------------|
| H | 4.87848723  | 1.20842088  | -3.47404934 |
| H | 3.60729682  | 0.05505610  | -3.87371459 |
| H | 3.57972061  | 0.89475490  | -2.31976192 |
| C | 6.38593938  | -2.22117025 | 0.80549493  |
| H | 5.46552297  | -2.51362721 | 1.32580987  |
| H | 7.09781809  | -3.04530725 | 0.91726832  |
| H | 6.79009495  | -1.35194861 | 1.33379683  |
| C | 7.29436420  | -3.43453148 | -3.97889543 |
| H | 8.38454712  | -3.33258538 | -3.90262586 |
| H | 7.06070704  | -4.49336368 | -3.81123293 |
| H | 7.00814530  | -3.18722374 | -5.00618039 |
| C | 4.23467975  | -0.42398023 | 3.05373807  |
| H | 3.58013444  | -0.89554197 | 2.31940501  |
| H | 4.87791127  | -1.20819124 | 3.47510235  |
| H | 3.60606376  | -0.05487506 | 3.87282986  |
| C | 6.38578279  | 2.22104554  | -0.80537920 |
| H | 6.79026032  | 1.35196386  | -1.33368200 |
| H | 5.46527929  | 2.51318954  | -1.32570439 |
| H | 7.09738395  | 3.04542796  | -0.91712269 |
| C | 7.29453449  | 3.43388444  | 3.97908078  |
| H | 8.38474170  | 3.33319637  | 3.90159427  |
| H | 7.05954402  | 4.49260848  | 3.81255419  |
| H | 7.00961578  | 3.18542096  | 5.00644741  |
| C | -4.22457049 | 4.87979544  | -0.30862919 |
| C | -4.83902052 | 5.92845157  | -0.37082657 |
| C | -4.22494517 | -4.87956463 | 0.30859314  |
| C | -4.83946964 | -5.92817730 | 0.37079824  |
| C | -5.55619220 | 7.15708028  | -0.44228899 |
| C | -5.15189807 | 8.17304429  | -1.33220511 |
| C | -6.68196504 | 7.37991269  | 0.37658681  |
| C | -5.85451048 | 9.37291692  | -1.39718482 |

|   |             |              |             |
|---|-------------|--------------|-------------|
| H | -4.28561309 | 8.00677262   | -1.96513465 |
| C | -7.37820382 | 8.58310480   | 0.30465980  |
| H | -6.99767531 | 6.60092864   | 1.06376771  |
| C | -6.96864052 | 9.58344062   | -0.58069777 |
| H | -5.53156477 | 10.14750679  | -2.08760527 |
| H | -8.24399934 | 8.74136859   | 0.94207495  |
| H | -7.51448426 | 10.52139401  | -0.63418195 |
| C | -5.55679139 | -7.15671588  | 0.44231410  |
| C | -5.15237016 | -8.17285733  | 1.33196983  |
| C | -6.68284020 | -7.37928434  | -0.37625498 |
| C | -5.85512395 | -9.37264519  | 1.39699093  |
| H | -4.28587531 | -8.00678855  | 1.96466532  |
| C | -7.37921809 | -8.58239343  | -0.30428920 |
| H | -6.99865265 | -6.60016207  | -1.06323236 |
| C | -6.96952446 | -9.58290784  | 0.58080600  |
| H | -5.53207579 | -10.14737370 | 2.08720793  |
| H | -8.24522507 | -8.74045243  | -0.94146798 |
| H | -7.51547499 | -10.52079726 | 0.63432092  |

**Table S7: Spatial coordinate for optimized 2+F<sup>-</sup> adduct**

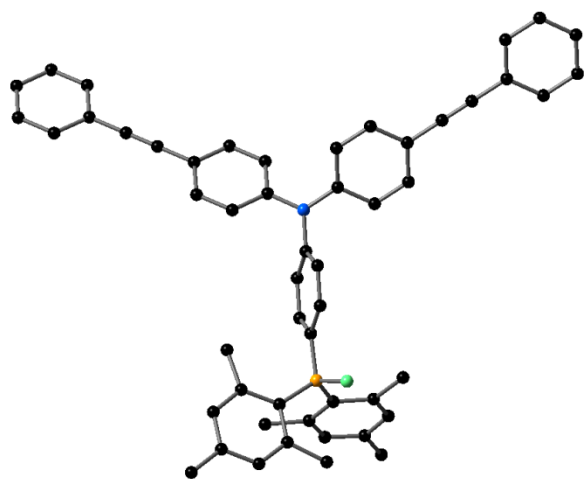

| Atom | X           | Y           | Z           |
|------|-------------|-------------|-------------|
| C    | -2.06744471 | -1.22392439 | 0.07781971  |
| C    | -3.19470719 | -1.44119744 | -0.73201345 |
| C    | -1.66940988 | -2.23384276 | 0.96995161  |
| C    | -3.90391134 | -2.63198946 | -0.65079773 |
| H    | -3.50828569 | -0.67024416 | -1.42846433 |
| C    | -2.37043725 | -3.43000538 | 1.04029662  |
| H    | -0.80618747 | -2.07315471 | 1.60761364  |
| C    | -3.50492731 | -3.65523522 | 0.23350757  |
| H    | -4.77021027 | -2.78918045 | -1.28580660 |
| H    | -2.05363587 | -4.20157639 | 1.73510732  |
| C    | -2.06735598 | 1.22399065  | -0.07793108 |
| C    | -3.19439721 | 1.44146405  | 0.73215151  |
| C    | -1.66943103 | 2.23376518  | -0.97027205 |
| C    | -3.90350989 | 2.63231405  | 0.65096722  |
| H    | -3.50787624 | 0.67061732  | 1.42876635  |
| C    | -2.37036087 | 3.42998690  | -1.04059079 |
| H    | -0.80637044 | 2.07291655  | -1.60811404 |
| C    | -3.50464005 | 3.65541304  | -0.23355824 |
| H    | -4.76963986 | 2.78966410  | 1.28616699  |
| H    | -2.05365279 | 4.20145090  | -1.73556248 |
| C    | 0.06689738  | -0.00002908 | -0.00009952 |
| C    | 0.78525153  | 1.02540109  | 0.64270883  |
| C    | 0.78519360  | -1.02548853 | -0.64292890 |
| C    | 2.17384944  | 1.01310205  | 0.64155500  |
| H    | 0.24673063  | 1.81948688  | 1.14966642  |
| C    | 2.17379164  | -1.01326927 | -0.64179022 |
| H    | 0.24662545  | -1.81955053 | -1.14987364 |
| C    | 2.92203340  | -0.00010432 | -0.00012067 |
| H    | 2.70198442  | 1.80827232  | 1.16072763  |
| H    | 2.70186397  | -1.80847483 | -1.16096789 |

|   |             |             |             |
|---|-------------|-------------|-------------|
| N | -1.34849417 | 0.00000219  | -0.00007201 |
| B | 4.48849334  | -0.00011957 | -0.00002390 |
| C | 5.25747395  | 0.88093653  | 1.07493772  |
| C | 5.07468669  | 0.69606098  | 2.46868978  |
| C | 6.13588386  | 1.92344524  | 0.65930333  |
| C | 5.74024592  | 1.52202465  | 3.38683061  |
| C | 6.76746337  | 2.73209777  | 1.60423524  |
| C | 6.58755289  | 2.54836251  | 2.98026882  |
| H | 5.58726935  | 1.35018321  | 4.45149562  |
| H | 7.41949298  | 3.53272861  | 1.25822157  |
| C | 5.25759407  | -0.88117624 | -1.07489423 |
| C | 5.07479119  | -0.69640648 | -2.46868125 |
| C | 6.13595948  | -1.92368749 | -0.65919821 |
| C | 5.74020179  | -1.52255018 | -3.38675168 |
| C | 6.76743236  | -2.73249673 | -1.60408218 |
| C | 6.58744981  | -2.54892181 | -2.98011442 |
| H | 5.58716526  | -1.35084768 | -4.45142948 |
| H | 7.41942043  | -3.53313311 | -1.25800287 |
| C | 4.23504132  | 0.42378693  | -3.05379185 |
| H | 4.87848723  | 1.20842088  | -3.47404934 |
| H | 3.60729682  | 0.05505610  | -3.87371459 |
| H | 3.57972061  | 0.89475490  | -2.31976192 |
| C | 6.38593938  | -2.22117025 | 0.80549493  |
| H | 5.46552297  | -2.51362721 | 1.32580987  |
| H | 7.09781809  | -3.04530725 | 0.91726832  |
| H | 6.79009495  | -1.35194861 | 1.33379683  |
| C | 7.29436420  | -3.43453148 | -3.97889543 |
| H | 8.38454712  | -3.33258538 | -3.90262586 |
| H | 7.06070704  | -4.49336368 | -3.81123293 |
| H | 7.00814530  | -3.18722374 | -5.00618039 |
| C | 4.23467975  | -0.42398023 | 3.05373807  |

|   |             |             |             |
|---|-------------|-------------|-------------|
| H | 3.58013444  | -0.89554197 | 2.31940501  |
| H | 4.87791127  | -1.20819124 | 3.47510235  |
| H | 3.60606376  | -0.05487506 | 3.87282986  |
| C | 6.38578279  | 2.22104554  | -0.80537920 |
| H | 6.79026032  | 1.35196386  | -1.33368200 |
| H | 5.46527929  | 2.51318954  | -1.32570439 |
| H | 7.09738395  | 3.04542796  | -0.91712269 |
| C | 7.29453449  | 3.43388444  | 3.97908078  |
| H | 8.38474170  | 3.33319637  | 3.90159427  |
| H | 7.05954402  | 4.49260848  | 3.81255419  |
| H | 7.00961578  | 3.18542096  | 5.00644741  |
| C | -4.22457049 | 4.87979544  | -0.30862919 |
| C | -4.83902052 | 5.92845157  | -0.37082657 |
| C | -4.22494517 | -4.87956463 | 0.30859314  |
| C | -4.83946964 | -5.92817730 | 0.37079824  |
| C | -5.55619220 | 7.15708028  | -0.44228899 |
| C | -5.15189807 | 8.17304429  | -1.33220511 |
| C | -6.68196504 | 7.37991269  | 0.37658681  |
| C | -5.85451048 | 9.37291692  | -1.39718482 |
| H | -4.28561309 | 8.00677262  | -1.96513465 |
| C | -7.37820382 | 8.58310480  | 0.30465980  |
| H | -6.99767531 | 6.60092864  | 1.06376771  |
| C | -6.96864052 | 9.58344062  | -0.58069777 |
| H | -5.53156477 | 10.14750679 | -2.08760527 |
| H | -8.24399934 | 8.74136859  | 0.94207495  |
| H | -7.51448426 | 10.52139401 | -0.63418195 |
| C | -5.55679139 | -7.15671588 | 0.44231410  |
| C | -5.15237016 | -8.17285733 | 1.33196983  |
| C | -6.68284020 | -7.37928434 | -0.37625498 |
| C | -5.85512395 | -9.37264519 | 1.39699093  |
| H | -4.28587531 | -8.00678855 | 1.96466532  |

|   |             |              |             |
|---|-------------|--------------|-------------|
| C | -7.37921809 | -8.58239343  | -0.30428920 |
| H | -6.99865265 | -6.60016207  | -1.06323236 |
| C | -6.96952446 | -9.58290784  | 0.58080600  |
| H | -5.53207579 | -10.14737370 | 2.08720793  |
| H | -8.24522507 | -8.74045243  | -0.94146798 |
| H | -7.51547499 | -10.52079726 | 0.63432092  |
| F | 4.49914449  | -1.12925361  | 0.92547211  |

**Table S8: Spatial coordinate for optimized compound 3**

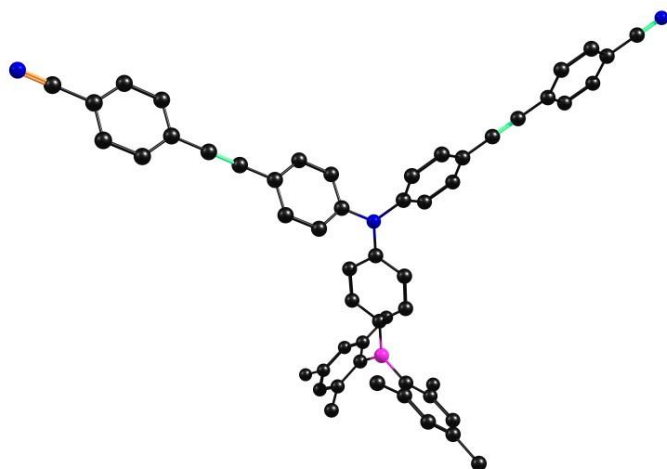

| Atom | X           | Y           | Z           |
|------|-------------|-------------|-------------|
| C    | 1.41260469  | 0.16132960  | 0.00063520  |
| C    | 2.01962814  | 1.13962140  | 0.80499056  |
| C    | 2.22382906  | -0.65489476 | -0.80446353 |
| C    | 3.40386890  | 1.30002797  | 0.79388307  |
| H    | 1.40089636  | 1.77019707  | 1.43547629  |
| C    | 3.60860377  | -0.49916974 | -0.79458952 |
| H    | 1.76248862  | -1.40880087 | -1.43435756 |
| C    | 4.20848884  | 0.48068343  | -0.00074553 |
| H    | 3.85563518  | 2.06258205  | 1.42313387  |
| H    | 4.22003018  | -1.14026963 | -1.42442074 |
| C    | -0.84588512 | 1.14262393  | 0.00064333  |

|   |             |             |             |
|---|-------------|-------------|-------------|
| C | -0.54275565 | 2.25512967  | -0.80142534 |
| C | -1.99869839 | 1.17740030  | 0.80214202  |
| C | -1.37029512 | 3.37631427  | -0.79141510 |
| H | 0.34228497  | 2.23393644  | -1.42925096 |
| C | -2.83022022 | 2.29557282  | 0.79066659  |
| H | -2.23657908 | 0.32513058  | 1.43061940  |
| C | -2.52112917 | 3.40378967  | -0.00082520 |
| H | -1.11939413 | 4.22775175  | -1.41881726 |
| H | -3.71812818 | 2.30411546  | 1.41762269  |
| C | -0.56620519 | -1.30384527 | 0.00037244  |
| C | -1.68090897 | -1.59733160 | -0.80201396 |
| C | -0.02052343 | -2.31960918 | 0.80231648  |
| C | -2.23855720 | -2.87438950 | -0.79181039 |
| H | -2.10481046 | -0.82040230 | -1.43022274 |
| C | -0.57377380 | -3.59860227 | 0.79133445  |
| H | 0.83660210  | -2.09953080 | 1.43070685  |
| C | -1.68804158 | -3.88471391 | -0.00036709 |
| H | -3.10118865 | -3.08270899 | -1.41951141 |
| H | -0.13767657 | -4.37170548 | 1.41875804  |
| N | 0.00013985  | 0.00006776  | 0.00108464  |
| B | -2.34595684 | -5.39787201 | -0.00064286 |
| C | -1.90305693 | -6.48984126 | -1.15560729 |
| C | -0.83907718 | -7.36068784 | -0.92082771 |
| C | -2.59326852 | -6.54239962 | -2.36691050 |
| C | -0.46489567 | -8.28407804 | -1.89745976 |
| C | -2.21892992 | -7.46522142 | -3.34354121 |
| C | -1.15416285 | -8.33608320 | -3.10883417 |
| H | 0.37446096  | -8.96997911 | -1.71235990 |
| H | -2.76228079 | -7.50645075 | -4.29871989 |
| C | -3.44677202 | -5.81906087 | 1.15404580  |
| C | -4.80900072 | -5.63049267 | 0.92097254  |

|   |             |              |             |
|---|-------------|--------------|-------------|
| C | -3.01491027 | -6.36435876  | 2.36340742  |
| C | -5.73963785 | -5.98690960  | 1.89737048  |
| C | -3.94523750 | -6.72027398  | 3.33980519  |
| C | -5.30801268 | -6.53113908  | 3.10680659  |
| H | -6.81347472 | -5.83740625  | 1.71361818  |
| H | -3.60515742 | -7.14945085  | 4.29345560  |
| C | -5.28584191 | -5.02901331  | -0.41410987 |
| H | -5.83444352 | -5.76652581  | -0.96184301 |
| H | -5.91618067 | -4.18629409  | -0.22072591 |
| H | -4.43821309 | -4.71630921  | -0.98738252 |
| C | -1.51084948 | -6.57292544  | 2.62011946  |
| H | -1.17114113 | -5.86364409  | 3.34566630  |
| H | -1.34568170 | -7.56465967  | 2.98629267  |
| H | -0.97069680 | -6.43538569  | 1.70676417  |
| C | -6.33512865 | -6.92377656  | 4.18498496  |
| H | -6.55430101 | -7.96805621  | 4.10533897  |
| H | -5.93161343 | -6.71693158  | 5.15415503  |
| H | -7.23311676 | -6.35914831  | 4.04458448  |
| C | -0.07742690 | -7.30307169  | 0.41639675  |
| H | -0.04858276 | -6.29261745  | 0.76718194  |
| H | -0.57573935 | -7.91683974  | 1.13741927  |
| H | 0.92123979  | -7.65972590  | 0.27369912  |
| C | -3.76829683 | -5.58113170  | -2.62550759 |
| H | -4.68519168 | -6.05426844  | -2.34205484 |
| H | -3.63363492 | -4.68997832  | -2.04878250 |
| H | -3.80247930 | -5.33125467  | -3.66536000 |
| C | -0.74065403 | -9.35470441  | -4.18726882 |
| H | -1.34239098 | -10.23475861 | -4.09606982 |
| H | -0.88209216 | -8.92482511  | -5.15685587 |
| H | 0.28982905  | -9.61227253  | -4.05818244 |
| C | -3.43802723 | 4.64108398   | -0.00168503 |



|   |             |             |             |
|---|-------------|-------------|-------------|
| C | -4.15320772 | 5.60617354  | -0.00235570 |
| C | 5.73853974  | 0.65545070  | -0.00155927 |
| C | 6.93197943  | 0.79176918  | -0.00219399 |
| C | -5.07010578 | 6.84346785  | -0.00321553 |
| C | -5.32004734 | 7.52732296  | 1.18649853  |
| C | -5.65035490 | 7.28066554  | -1.19425668 |
| C | -6.15056041 | 8.64835746  | 1.18545169  |
| H | -4.86248212 | 7.18299353  | 2.12522860  |
| C | -6.48105849 | 8.40114199  | -1.19529806 |
| H | -5.45277802 | 6.74152075  | -2.13221216 |
| C | -6.73149815 | 9.08496717  | -0.00497052 |
| H | -6.34802656 | 9.18682042  | 2.12369822  |
| H | -6.93917192 | 8.74561435  | -2.13379005 |
| C | 8.46203033  | 0.96653645  | -0.00300774 |
| C | 9.13406940  | 1.22431810  | -1.19777141 |
| C | 9.17590915  | 0.86752903  | 1.19155680  |
| C | 10.52019444 | 1.38283809  | -1.19824493 |
| H | 8.57144186  | 1.30269648  | -2.13928610 |
| C | 10.56175650 | 1.02552882  | 1.19108898  |
| H | 8.64572135  | 0.66468015  | 2.13348432  |
| C | 11.23411465 | 1.28291255  | -0.00427903 |
| H | 11.04980886 | 1.58529600  | -2.14045571 |
| H | 11.12486309 | 0.94684225  | 2.13237306  |
| C | 12.76428706 | 1.45661234  | -0.00515088 |
| C | -7.64925797 | 10.32162246 | -0.00574839 |
| N | 13.90356998 | 1.58593972  | -0.00580001 |
| N | -8.33257187 | 11.24236854 | -0.00632754 |

**Table S9: Spatial coordinate for optimized 3+F<sup>-</sup> adduct**

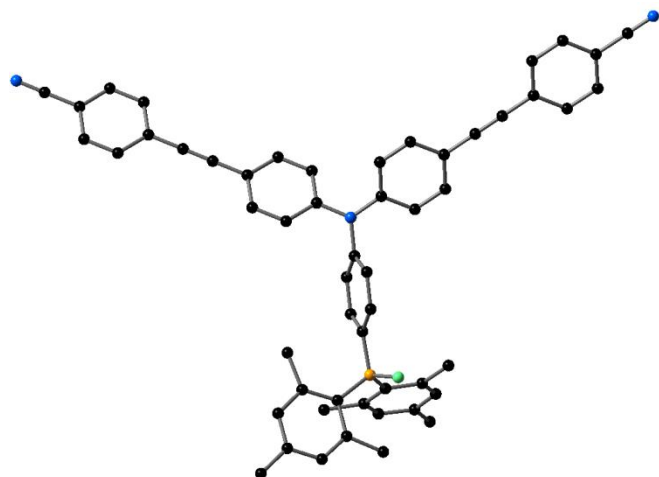

| Atom | X           | Y           | Z           |
|------|-------------|-------------|-------------|
| C    | -1.97353132 | 1.12516685  | -0.17738784 |
| C    | -2.59253494 | 2.24565772  | -0.77255809 |
| C    | -2.79863229 | 0.11808513  | 0.36674558  |
| C    | -3.97276810 | 2.36301042  | -0.80087603 |
| H    | -1.98072480 | 3.01568901  | -1.22956697 |
| C    | -4.17787092 | 0.23700324  | 0.33309093  |
| H    | -2.34010018 | -0.75623907 | 0.81419038  |
| C    | -4.80094479 | 1.36377986  | -0.24664832 |
| H    | -4.42956160 | 3.22800407  | -1.27274561 |
| H    | -4.79417568 | -0.54544309 | 0.76529526  |
| C    | 0.30157603  | 2.06834642  | -0.07502894 |
| C    | -0.04196652 | 3.24502054  | 0.62574413  |
| C    | 1.58204004  | 1.99291451  | -0.66344915 |
| C    | 0.84484231  | 4.30594260  | 0.71073693  |
| H    | -1.00568940 | 3.31275229  | 1.11834957  |
| C    | 2.46722811  | 3.05398670  | -0.57289309 |
| H    | 1.86899028  | 1.09055039  | -1.19107013 |
| C    | 2.12044666  | 4.23997118  | 0.11060926  |
| H    | 0.56456266  | 5.19846122  | 1.26247096  |
| H    | 3.44393152  | 2.97887321  | -1.04122151 |
| C    | -0.02341620 | -0.35879778 | -0.22492461 |

|   |             |             |             |
|---|-------------|-------------|-------------|
| C | 0.72358827  | -0.86650520 | 0.84284068  |
| C | -0.25127969 | -1.16035404 | -1.34845158 |
| C | 1.24166163  | -2.15991247 | 0.77035026  |
| H | 0.88214363  | -0.25115278 | 1.72587603  |
| C | 0.27211747  | -2.45222699 | -1.39215635 |
| H | -0.84297089 | -0.76900672 | -2.17351255 |
| C | 1.05223755  | -2.99262967 | -0.34940575 |
| H | 1.79211186  | -2.54274356 | 1.62671776  |
| H | 0.07139415  | -3.07741004 | -2.25742579 |
| N | -0.57658966 | 0.97594765  | -0.15833833 |
| B | 1.56843820  | -4.56290154 | -0.46061614 |
| C | 1.44882321  | -5.22052900 | 1.07055127  |
| C | 0.18854580  | -5.68319178 | 1.55147985  |
| C | 2.52769315  | -5.28645145 | 1.99364555  |
| C | 0.05567133  | -6.21810880 | 2.83946616  |
| C | 2.35622183  | -5.82367188 | 3.27985929  |
| C | 1.13065266  | -6.31308209 | 3.72342016  |
| H | -0.92680695 | -6.56273628 | 3.16474161  |
| H | 3.21296841  | -5.85522455 | 3.95391326  |
| C | 3.02053819  | -4.85054698 | -1.24047127 |
| C | 3.95346363  | -3.88575353 | -1.70237117 |
| C | 3.32641981  | -6.20926614 | -1.55924408 |
| C | 5.10172431  | -4.26423019 | -2.41962110 |
| C | 4.48119270  | -6.55040512 | -2.27275007 |
| C | 5.39236453  | -5.59137513 | -2.71718892 |
| H | 5.78943178  | -3.48740729 | -2.75542841 |
| H | 4.67132300  | -7.60210019 | -2.49043727 |
| C | 3.80637654  | -2.39233241 | -1.46407686 |
| H | 3.69996892  | -2.14492287 | -0.40316448 |
| H | 4.68858945  | -1.86042681 | -1.84106054 |
| H | 2.92634588  | -1.97720241 | -1.96576335 |

|   |             |             |             |
|---|-------------|-------------|-------------|
| C | 2.43062153  | -7.36270935 | -1.14363334 |
| H | 2.84006911  | -8.31679778 | -1.49757672 |
| H | 2.32863124  | -7.42101918 | -0.05460394 |
| H | 1.42205895  | -7.23679686 | -1.54170725 |
| C | 6.64438065  | -5.98173659 | -3.46935953 |
| H | 7.39637449  | -6.43479233 | -2.80710664 |
| H | 6.43210596  | -6.71725005 | -4.25626488 |
| H | 7.11222457  | -5.11121648 | -3.94404528 |
| C | -1.08576424 | -5.60951115 | 0.72705388  |
| H | -1.23039527 | -4.61633471 | 0.29248516  |
| H | -1.07158679 | -6.30669122 | -0.11468750 |
| H | -1.95502750 | -5.84072001 | 1.35610855  |
| C | 3.92606322  | -4.78806232 | 1.66870089  |
| H | 4.44176188  | -5.44125935 | 0.95761655  |
| H | 3.92178730  | -3.78957014 | 1.22186740  |
| H | 4.53294268  | -4.73984767 | 2.58159061  |
| C | 0.97120860  | -6.92549125 | 5.09647166  |
| H | 1.02953720  | -8.02341529 | 5.06457847  |
| H | 1.75493827  | -6.58165854 | 5.78209061  |
| H | 0.00097152  | -6.67177902 | 5.54187446  |
| C | 3.02489486  | 5.32833091  | 0.19648663  |
| C | 3.80132926  | 6.26579624  | 0.26773501  |
| C | -6.21323233 | 1.48469286  | -0.27783911 |
| C | -7.42798812 | 1.58694585  | -0.30286616 |
| C | 4.70494097  | 7.35438629  | 0.34797648  |
| C | 5.98330396  | 7.27891154  | -0.25047712 |
| C | 4.34921072  | 8.54196709  | 1.02702095  |
| C | 6.86728429  | 8.34434992  | -0.17470976 |
| H | 6.26743061  | 6.37151797  | -0.77326238 |
| C | 5.23173456  | 9.60843133  | 1.10392698  |
| H | 3.37060182  | 8.61040982  | 1.49090148  |

|   |              |             |             |
|---|--------------|-------------|-------------|
| C | 6.50144861   | 9.52217475  | 0.50317908  |
| H | 7.84669343   | 8.27601636  | -0.63765879 |
| H | 4.94866816   | 10.51603948 | 1.62778803  |
| C | -8.84010523  | 1.70212554  | -0.33111707 |
| C | -9.65947773  | 0.68780459  | 0.21464428  |
| C | -9.46300279  | 2.83350927  | -0.90541923 |
| C | -11.04119450 | 0.79955936  | 0.18838572  |
| H | -9.19202747  | -0.18588071 | 0.65684312  |
| C | -10.84446244 | 2.94712433  | -0.93263965 |
| H | -8.84370157  | 3.61788089  | -1.32823208 |
| C | -11.65003695 | 1.93119832  | -0.38541409 |
| H | -11.66111200 | 0.01461618  | 0.61004425  |
| H | -11.31288770 | 3.82016621  | -1.37611856 |
| C | -13.07603941 | 2.04920967  | -0.41219747 |
| C | 7.41186108   | 10.62363936 | 0.58092385  |
| N | -14.23622058 | 2.14720497  | -0.43397683 |
| N | 8.15122589   | 11.52110249 | 0.64419394  |
| F | 0.58448338   | -5.18801952 | -1.33977463 |

## References

Gaussian 09, Revision A.02, M. J. Frisch, G. W. Trucks, H. B. Schlegel, G. E. Scuseria, M. A. Robb, J. R. Cheeseman, G. Scalmani, V. Barone, B. Mennucci, G. A. Petersson, H. Nakatsuji, M. Caricato, X. Li, H. P. Hratchian, A. F. Izmaylov, J. Bloino, G. Zheng, J. L. Sonnenberg, M. Hada, M. Ehara, K. Toyota, R. Fukuda, J. Hasegawa, M. Ishida, T. Nakajima, Y. Honda, O. Kitao, H. Nakai, T. Vreven, J. A. Montgomery, Jr., J. E. Peralta, F. Ogliaro, M. Bearpark, J. J. Heyd, E. Brothers, K. N. Kudin, V. N. Staroverov, R. Kobayashi, J. Normand, K. Raghavachari, A. Rendell, J. C. Burant, S. S. Iyengar, J. Tomasi, M. Cossi, N. Rega, J. M. Millam, M. Klene, J. E. Knox, J. B. Cross, V. Bakken, C. Adamo, J. Jaramillo, R. Gomperts, R. E. Stratmann, O. Yazyev, A. J. Austin, R. Cammi, C. Pomelli, J. W. Ochterski, R. L. Martin, K. Morokuma, V. G. Zakrzewski, G. A. Voth, P. Salvador, J. J. Dannenberg, S. Dapprich, A. D. Daniels, O. Farkas, J. B. Foresman, J. V. Ortiz, J. Cioslowski, and D. J. Fox, Gaussian, Inc., Wallingford CT, **2009**.
